1 Transiently restricting individual amino acids protects *D.*  
2 *melanogaster* against multiple stressors

3 Tahlia L. Fulton, Joshua J. Johnstone, Jing J. Tan, Krithika Balagopal, Amy Dedman, Travis  
4 K. Johnson, Andrea Y. Chan, Christen K. Mirth<sup>Δ</sup> and Matthew D. W. Piper <sup>\*Δ</sup>

5 School of Biological Sciences, Monash University, Melbourne, VIC 3800, Australia.

6 \*Corresponding author:

7 Matthew D. W. Piper, email: [matthew.piper@monash.edu](mailto:matthew.piper@monash.edu)

8 <sup>Δ</sup> Co-senior authors

9       Keywords: *Drosophila melanogaster*, amino acid, dietary pre-conditioning, cross-  
10 tolerance.

11 Author contributions:

12 Conceptualisation: Tahlia Fulton, Christen Mirth, Matthew Piper; Methodology: Tahlia  
13 Fulton, Krithika Balagopal, Travis Johnson, Andre Chan, Christen Mirth, Matthew Piper;  
14 Software: Jing Tan; Formal Analysis: Tahlia Fulton, Christen Mirth; Investigation: Tahlia  
15 Fulton, Joshua; Johnstone, Krithika Balagopal, Amy Dedman, Travis Johnson; Writing:  
16 Tahlia Fulton, Christen Mirth, Matthew Piper; Supervision: Christen Mirth, Matthew Piper

## 17 Abstract

18 Nutrition and resilience are linked, though it is not yet clear how diet confers stress  
19 resistance or the breadth of stressors that it can protect against. We have previously shown  
20 that transiently restricting an essential amino acid can extend lifespan and also protect against  
21 nicotine exposure in *Drosophila melanogaster*, raising the possibility that amino acid  
22 restriction is geroprotective because of elevated detoxification capacity. Here, we sought to  
23 characterise the nature of this dietary mediated protection, and determine whether it was sex,  
24 amino acid, and/or nicotine specific. When we compared between sexes, we found that  
25 isoleucine deprivation increases female, but not male, nicotine resistance. Surprisingly, we  
26 found that this protection afforded to females was not replicated by dietary protein restriction  
27 and was instead specific to individual amino acid restriction. Other studies have documented  
28 methionine or leucine restriction conferring stress resistance, though we previously found that  
29 individually depriving them did not increase nicotine resistance. We therefore wondered  
30 whether reducing the severity of restriction of these amino acids could confer nicotine  
31 resistance. This was true for methionine restriction, and we found that flies fed a diet  
32 containing 25% methionine for 7 days protected against subsequent nicotine poisoning  
33 (~30% longer lived than controls with all amino acids). However, when dietary leucine was  
34 altered, nicotine resistance changed, but no single diet was protective. To understand whether  
35 these beneficial effects of diet were specific to nicotine or were generalisable across stressors,  
36 we pre-treated with amino acid restriction diets and exposed them to other types of stress. We  
37 did not find any diets that protected against heat stress or infection with the bacterium  
38 *Enterococcus faecalis*. However, we found that some of the diets that protected against  
39 nicotine also protected against oxidative and starvation stress, and improved survival  
40 following cold shock. Interestingly, we found that a diet lacking isoleucine was the only diet

41 to protect against all these stressors. These data point to isoleucine as a critical determinant of  
42 robustness in the face of environmental challenges.

## 43 Introduction

44 Nutrition is closely linked to health and the more we explore this connection, the  
45 closer we come to being able to deliberately manipulate components of the diet to influence  
46 health and fitness. Nutrient restriction, in particular protein restriction, has been linked to  
47 increased lifespan, improved metabolic health, and stress resistance in many model systems,  
48 usually at the cost of reproductive output (Zhang et al. 2023; Krittika and Yadav 2020;  
49 Jongbloed et al. 2017; Robertson et al. 2015; Mirzaei, Suarez, and Longo 2014; Brandhorst et  
50 al. 2013; Sultoukis and Partridge 2016). These effects can also be mimicked by restricting  
51 dietary amino acids (Yap et al. 2020; Yeh et al. 2023; Trautman, Richardson, and Lamming  
52 2022; Grandison, Piper, and Partridge 2009; Fontana et al. 2016). For instance, transient  
53 isoleucine deprivation enhances nicotine resistance and extends lifespan in *Drosophila*  
54 (Fulton, Mirth, and Piper 2022), methionine restriction enhances resilience to chemical and  
55 thermal stress in yeast, mice, and human cells (Trocha et al. 2019; Johnson and Johnson  
56 2014; Miller et al. 2005), and depriving mice of tryptophan protects them against ischaemic  
57 reperfusion injury (Peng et al. 2012). These beneficial effects of diet, particularly these short-  
58 term restrictions, have attracted interest for their potential to enhance human health. Current  
59 data indicate that evolutionarily conserved mechanisms mediate these effects (Harputlugil et  
60 al. 2014; Peng et al. 2012; Fulton, Mirth, and Piper 2022), though little is known about the  
61 breadth of stress resistance these dietary manipulations afford and/or if there are costs beyond  
62 reproductive arrest that are associated with their implementation. These considerations, as  
63 well as understanding their mechanisms, are important when seeking to apply treatment  
64 protocols across species.

65           It is important to consider that seemingly beneficial dietary strategies may impose  
66 unintended costs, or trade-offs. One trade-off that is well described in the literature is  
67 between lifespan and reproduction; while lifespan is longest on low protein, high  
68 carbohydrate diets, reproduction in females is highest in intermediate protein, intermediate  
69 carbohydrate diets (Lee et al. 2008; Holliday 1989; Partridge, Gems, and Withers 2005).  
70 Because these traits are optimised on different diets, this makes it difficult for animals to be  
71 both long lived and have maximal reproduction. Using a similar logic, if short-term amino  
72 acid restriction can protect flies against nicotine, and prolong life, does this mean that it will  
73 protect them against other stressors too, or do these benefits trade-off against other  
74 dimensions of stress resistance?

75           There are different types of biotic and abiotic stressors against which organisms must  
76 evolve strategies to resist, tolerate and/or avoid. In nature, flies and other animals frequently  
77 encounter stressors such as naturally occurring insecticides, temperature fluctuations, and  
78 infections (Kaunisto, Ferguson, and Sinclair 2016). It is also likely that an animal will  
79 encounter more than one stressor at a time. For example, winter is not only cold but also dry,  
80 so insects must tolerate both simultaneously to survive (Sinclair et al. 2013). It is therefore  
81 important that organisms launch multiple resistance phenotypes, even when sensing only one  
82 stressor, so they have the best chance to survive current and anticipated environments.

83           In this paper, we present our findings on the way *Drosophila melanogaster* initiate a  
84 broad range of stress responses when experiencing short term amino acid deprivation. Our  
85 study contributes to a deeper understanding of the complex interactions between nutrition and  
86 stress resistance, offering insights that could inform the development of personalised dietary  
87 strategies for promoting health and longevity.

## 88 Methods

### 89 *Fly husbandry*

90 Experiments were conducted using white-eyed *Drosophila melanogaster* (strain  
91 Dahomey; wDah). Outbred wDah stocks are maintained in high-density population cages  
92 with continuous overlapping generations on a sugar yeast (SY) diet (Bass et al. 2007)  
93 (Supplementary table 1) at 25°C, ambient humidity, and a 12:12 hour light:dark cycle.  
94 Experimental flies were reared from egg to adult at a density of ~250-300 flies per bottle with  
95 70mL SY medium and mating status was standardised by keeping newly emerged adult flies  
96 in mixed cohorts on fresh SY diet for 2 days following eclosion (Figure 1) Unless specified,  
97 experimental flies were mated, female, wDah. Two days after eclosing, flies were lightly  
98 anaesthetised with CO<sub>2</sub> and sorted by sex into vials containing a complete synthetic diet  
99 (Piper et al. 2014) (Supplementary table 2) in cohorts of 5 flies per vial. Flies were  
100 transferred to fresh food every Monday, Wednesday, and Friday, unless otherwise specified.  
101 Experiments and stocks were maintained at 25°C, 60% humidity and a 12:12 hour light:dark  
102 cycle.

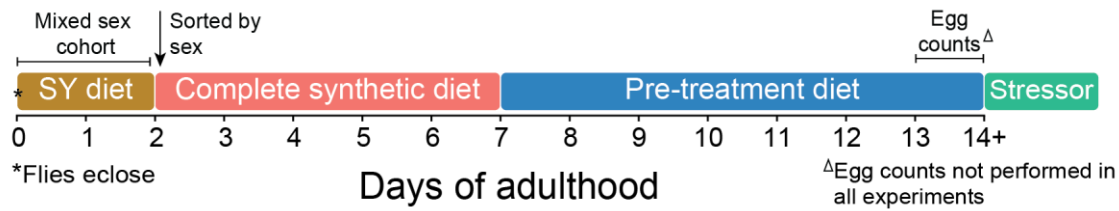

103

## 104 **Figure 1**

105 General methods for experiments. Newly emerged adult flies were transferred to fresh Sugar  
106 Yeast (SY) food to mate for 2 days, then sorted into vials containing a complete synthetic  
107 medium at a density of 5 flies (of the same sex) per vial. Unless otherwise specified, flies  
108 were transferred to their pre-treatment diet on day 7 of adulthood. If fecundity was measured  
109 before exposure to the stressor, flies were transferred to fresh vials on day 13 of adulthood  
110 and the eggs in those vials were counted on day 14.

### 111 *Synthetic media preparation*

112 Synthetic media were prepared as described by Piper et al. (2014) containing the  
113 nutrients listed in Supplementary table 2. The complete synthetic diet contained an exome  
114 matched ratio of amino acids (Piper et al. 2017) (FLYaa), and the other pre-treatment diets  
115 were prepared in the same way except with a reduced amount of the focal amino acid. Media  
116 were prepared in advance and stored for up to 4 weeks at 4°C.

### 117 *Laced-media preparation*

118 Survival under nicotine or paraquat exposure was measured using fly food that was  
119 laced with the respective drug. Nicotine-laced medium was prepared by aliquoting 100μL of  
120 diluted free base nicotine (Supplementary table 3) into a vial containing 3mL of cooled,  
121 gelled complete synthetic medium (final concentration of 0.83mg/mL nicotine in vials).  
122 Paraquat laced vials were similarly prepared by aliquoting 100μL of diluted methyl viologen  
123 dichloride hydrate (Supplementary table 3) onto 2mL of cooled, complete synthetic medium  
124 (final concentration of 10mM paraquat in vials). Laced vials were then kept in a fabric cover  
125 at room temperature for 24-48h to ensure an even dispersion of toxin throughout the food.

126 Laced food was prepared only in sufficient volumes to match what was needed for immediate  
127 use, and only 24-48h in advance of use, as these drugs lose potency over time.

### 128 ***Egg counting***

129 When measuring fecundity, flies were first allowed to lay eggs in fresh vials for 24h.  
130 Following this, flies were transferred to new vials and the vials containing eggs were  
131 photographed using a stereo microscope (Zeiss; Stemi 508) with an attached camera (Zeiss;  
132 Axioxam ERc 5s). The photographs were then piped through an application that was made  
133 in-house by Jing J. Tan to count the number of eggs in each vial. This application is available  
134 for public use here: [https://github.com/Eyehavelived/egg\\_counter](https://github.com/Eyehavelived/egg_counter)

### 135 ***Nicotine and paraquat exposure protocol***

136 Following pre-treatment (Figure 1), cohorts of 5 flies per vial were transferred into  
137 vials containing either 0.83mg/mL nicotine or 10mM paraquat. After 48h in these toxin-laced  
138 vials, flies were transferred to freshly prepared toxin-laced vials. Once initially exposed to  
139 their respective toxin, survival was recorded at 7am, 1pm and 7pm for 3 days, and then at  
140 8am and 5pm for 2 days, following which any remaining surviving flies were censored. Fly  
141 survival was recorded using the software DLife (Linford et al. 2013).

### 142 ***Starvation protocol***

143 After they were pre-treated with amino acid deprivation (Figure 1), flies were mildly  
144 anaesthetised with CO<sub>2</sub> (3L/min for < 5 min) and placed individually into wells of a 96 well  
145 tissue culture plate (Falcon: FAL353072) that contained 700uL of 2% agar (Sigma Aldrich:  
146 A7002). Before flies awoke, the lid was placed on the plate to contain single flies to  
147 individual wells. We fitted a custom-built plate scanning robot with a digital camera (Dino-  
148 Lite) and used this robot to photograph each well of each plate every hour. We sorted the

149 images by well location and used the photos in series to determine when the fly stopped  
150 moving, at which point they were scored as dead.

### 151 ***Heat knockdown protocol***

152 Following pre-treatment with their respective diets (Figure 1) flies were individually  
153 transferred to 5mL glass vials using a mouth-controlled aspirator. The vials were then  
154 submerged into a 39°C recirculating water bath that was heated by a digital thermos-regulator  
155 (Model: TH5; Ratek). Heat knockdown time was measured as the time taken, to the nearest  
156 second, until a fly was immobile.

### 157 ***Cold shock protocol***

158 Flies were pre-treated with their respective diets (Figure 1) and then individually  
159 transferred to 1.5mL Eppendorf tubes using a mouth-controlled aspirator. The Eppendorf  
160 tubes were then submerged in a tank containing 50% propylene glycol (v/v, with water) that  
161 had been cooled to 0°C using a Thermoline liquid cooler (TRC-500). After 5h at 0°C, flies  
162 were then transferred to 25°C to recover. Recovery time was measured as the time taken (to  
163 the nearest second) for flies to begin moving again. A small number of flies (11 out of 300)  
164 did not recover within 2 hours, and they were considered dead and omitted from the analysis.  
165 All flies that recovered were transferred individually into vials containing a complete  
166 synthetic diet, and survival was recorded 2-3 times a day for 5 days using the software DLife  
167 (Linford et al. 2013).

### 168 ***Infection protocol***

169 Wild-caught *E. faecalis* stocks (Lazzaro, Sackton, and Clark 2006) were stored at -  
170 80C in Luria Bertani (LB) broth with 15% glycerol. To prepare bacteria to infect flies, a stock  
171 was first streaked onto an LB plate and grown overnight at 37C. A single bacterial colony  
172 was then picked from this plate and grown overnight in 2mL of LB broth, in an orbital shaker



173 kept at 37C rotating 200 times per minute. The overnight cultures were diluted with sterile  
174 phosphate buffered saline (PBS, Ph = 7.4) to an optical density (OD<sub>A600</sub>) of 0.1. Pre-treated  
175 flies (Figure 1), were lightly anaesthetised with CO<sub>2</sub> (3L/min for <5min) and injected with  
176 0.1 OD<sub>A600</sub> *E. faecalis* using the septic pinprick method (Khalil et al. 2015). Control flies  
177 were instead injected with sterile PBS. Following infection, flies were transferred in cohorts  
178 of 5 to a complete synthetic diet, and survival was recorded 2-3 times a day using the  
179 software DLife (Linford et al. 2013). Infected and control flies were transferred to fresh food  
180 every day, and the old vials were photographed to measure daily fecundity.

### 181 *Statistical analysis*

182 All analyses were completed using R (Team 2021) (version 4.2.2) and R Studio  
183 (Team 2020) (version 1.4.1106) and we created all plots using ggplot2 (Wickham 2016). All  
184 data and scripts are publicly available at: [To be made freely available through Figshare on  
185 publication].

186 To determine whether the independent variables of a model could explain variation in  
187 the data, we initially analysed the models using a type II or III ANOVA from the package car  
188 (Fox and Weisberg 2019).

189 Cox Proportional-Hazards modelling was used to analyse survival. To do this, we  
190 used the “coxph” function from the package survival (Therneau 2021).

191 Differences in fecundity were analysed using a linear model (base R, “lm”) and post-  
192 hoc comparisons from the emmeans (Lenth 2021) and multcomp (Hothorn, Bretz, and  
193 Westfall 2008) packages.

194 Linear models (base R, “lm”) were also used to model both duration of pre-treatment  
195 and dose of amino acid as a function of survival. To determine whether pre-treatment

196 duration or availability of the focal amino acid significantly impacted survival, we analysed  
197 the model using the “Anova” function from the package car (Fox and Weisberg 2019).

## 198 Results

199 Pre-treatment diets that protect female flies from nicotine do not protect males.

200 In our previous work, we found that some diets lacking an essential amino acid  
201 protected female flies from subsequent nicotine poisoning (Fulton, Mirth, and Piper 2022).  
202 While female flies stop laying eggs when they are fed food without one or more essential  
203 amino acids, this protective effect cannot be attributed solely to a simple trade-off against  
204 reproduction. This is because neither a leucine or methionine dropout, or a diet missing all  
205 amino acids was protective, yet they still reduced egg laying to the same level as protective  
206 diets (Fulton, Mirth, and Piper 2022). As protection by diet cannot be simply explained by a  
207 trade-off against reproduction, we hypothesised that males – who are thought to expend less  
208 energy for reproduction (Magwere, Chapman, and Partridge 2004) - could be afforded the  
209 same protective benefits of diets that increased female flies’ nicotine resistance. To explore  
210 this, we pre-treated both sexes with a diet lacking isoleucine for 7 days, which we previously  
211 found to be the most protective pre-treatment regimen (Fulton, Mirth, and Piper 2022). We  
212 also pre-treated flies with a nutritionally complete diet to normalise results between males  
213 and females, and a protein-free diet to control for removing all amino acids.

214 When comparing males and females that were not pre-treated (complete diet), males  
215 had a greater nicotine resistance than fully-fed females (Figure 2 .A;  $P = 0.04$ ). However,  
216 pretreating flies with an isoleucine dropout diet for 7 days increased female, but not male,  
217 nicotine resistance (Figure 2. B; Table 1). Removing all amino acids was equally detrimental  
218 to both sexes (Table 1). These results indicate that there is sexual dimorphism in the stress  
219 resistance afforded by diet.

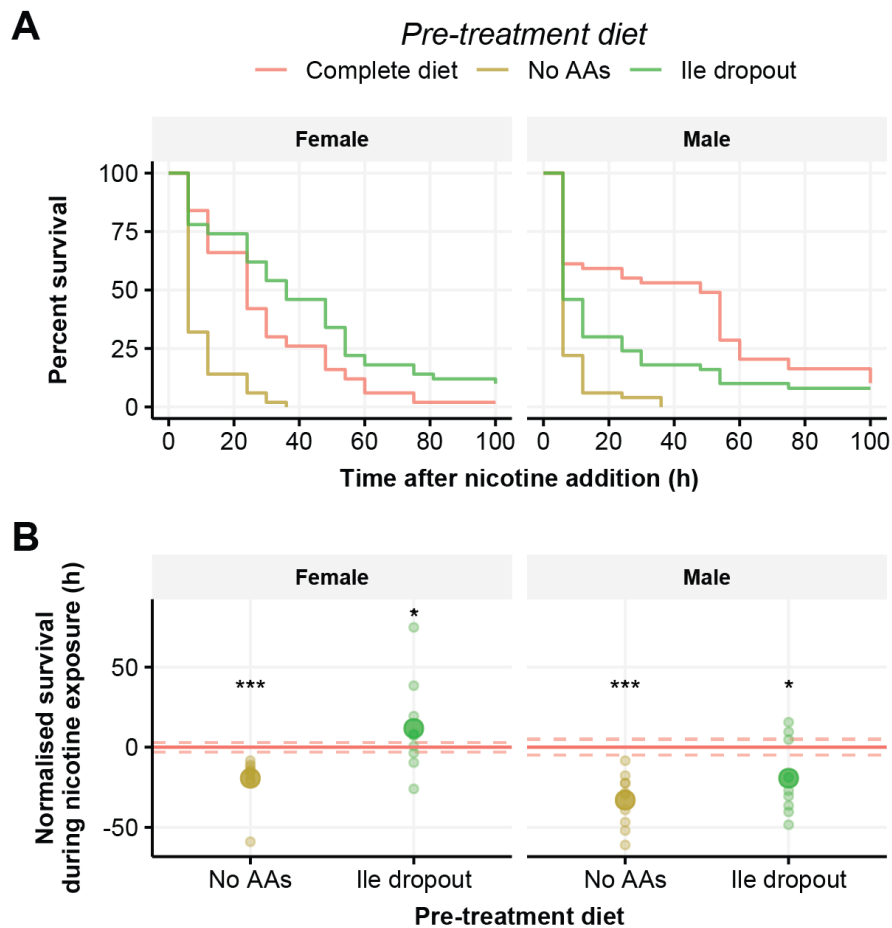

220

221 **Figure 2. Pre-treatment with a diet lacking isoleucine protects female, but not male, flies**  
222 **against nicotine poisoning.**

223 Male and female flies were pre-treated with one of three diets - isoleucine dropout, no amino  
224 acids (AAs) or a complete diet - before chronic exposure to 0.83mg/mL nicotine. (A)  
225 Survival curves of flies immediately after introduction of nicotine. (B) Survival time of pre-  
226 treated flies that has been normalised to survival of flies fed a nutritionally complete synthetic  
227 diet (red horizontal line +/- SE indicated by dashed red lines), small circles represent mean  
228 lifespan for each replicate and large circles representing the group mean. In females, flies that  
229 were pre-treated with a diet lacking amino acids had reduced nicotine resistance ( $P < 0.001$ ),  
230 whereas pre-treatment with an isoleucine dropout diet protected flies from nicotine ( $P =$   
231 0.02). Compared to the control diet, male flies were more susceptible to nicotine when they  
232 were pre-treated with either a diet lacking amino acids ( $P < 0.001$ ) or isoleucine alone ( $P =$   
233 0.02).  $N = 49-50$  flies per pre-treatment group for each sex. \*\*\* $P < 0.001$ , \*\*  $P < 0.01$ , \* $P <$   
234 0.05.

| Terms                               | n  | Estimate | Z value        |
|-------------------------------------|----|----------|----------------|
| <b>Female</b>                       |    |          |                |
| Complete diet                       | 50 | NA       | NA             |
| No AAs                              | 50 | 1.339    | <b>6.03***</b> |
| Ile dropout                         | 50 | -0.477   | <b>-2.27*</b>  |
| <b>Male</b>                         |    |          |                |
| Complete diet                       | 49 | NA       | NA             |
| No AAs                              | 50 | 1.215    | <b>5.24***</b> |
| Ile dropout                         | 50 | 0.483    | <b>2.26*</b>   |
| ***p < 0.001, **p < 0.01, *p < 0.05 |    |          |                |

235

236 **Table 1**

237 Differences in survival between flies that were pre-treated with a diet lacking amino acids (no  
238 AAs) or an isoleucine dropout diet compared to flies that were fed a complete diet, separated  
239 by sex. Summary of cox-proportional hazards modelling. Confidence level = 95%.

240 Restricting individual amino acids, but not all amino acids proportionately, is  
241 protective against nicotine exposure.

242 Restricting protein in the diet of model organisms has repeatedly increased the  
243 consumer's resilience to stress (Mirzaei, Raynes, and Longo 2016). We were therefore  
244 interested in whether protein restriction could protect female flies against nicotine in the same  
245 way that single amino acid deprivation does. In all prior experiments, we have found that  
246 completely depriving flies of protein for short durations has not been beneficial. However, we  
247 have also found that the strength of the protective response varies with the identity of the  
248 amino acid, the degree of restriction and the duration of pre-treatment (Fulton, Mirth, and  
249 Piper 2022). It is therefore possible that manipulating total protein could be protective when  
250 it is restricted in a way that we have not yet explored. We hypothesised that feeding flies less  
251 protein, or starving them of protein for a shorter period of time, could protect them against  
252 nicotine in the same way that restricting a single amino acid does.

253 To do this, we pre-treated two separate cohorts of flies. The first cohort was fed one  
254 of seven diets in which all amino acids were restricted to 75%, 50%, 25% or 0% of the  
255 amount in the complete diet for seven days prior to exposure to nicotine. The second cohort  
256 was fed a diet lacking amino acids/protein for shorter lengths of time before nicotine  
257 exposure. We found that both methods of protein restriction significantly impacted fecundity,  
258 which we measured in the 24h prior to nicotine exposure (Figure 1). We found that for every  
259 6.66% that protein was reduced in the diet, egg laying was reduced by approximately 1 egg  
260 per female in the 24 hours measured ( $F_4 = 81.49$ ,  $P < 0.001$ ). Similarly, consuming less  
261 protein by spending more time on a diet without protein also reduced fecundity by  
262 approximately 2 eggs per female over 24h for every additional day without protein ( $F_4 =$   
263  $76.79$ ,  $P < 0.001$ ). These decreases in fecundity are similar to what is observed when flies are  
264 deprived of a single essential amino acid (Alves et al. 2022). When we exposed these cohorts

265 of flies to nicotine after pretreatment, we found that, contrary to expectations, no level of  
266 protein restriction increased nicotine resistance, and reducing protein to 25 or 0% was  
267 detrimental (Figure 3.C; Table 2; Supplementary Figure 1.A). Similarly, reducing the time  
268 that flies were starved of protein did not increase their nicotine resistance, and, as we  
269 previously found, starving them of protein for 7 days was detrimental (Figure 3.D; Table 2;  
270 Supplementary Figure 1.B). These results suggest that the benefits of individual amino acid  
271 restrictions prior to nicotine poisoning are specific to individual amino acids and perhaps  
272 require the presence of one or more of the remaining 19 amino acids.

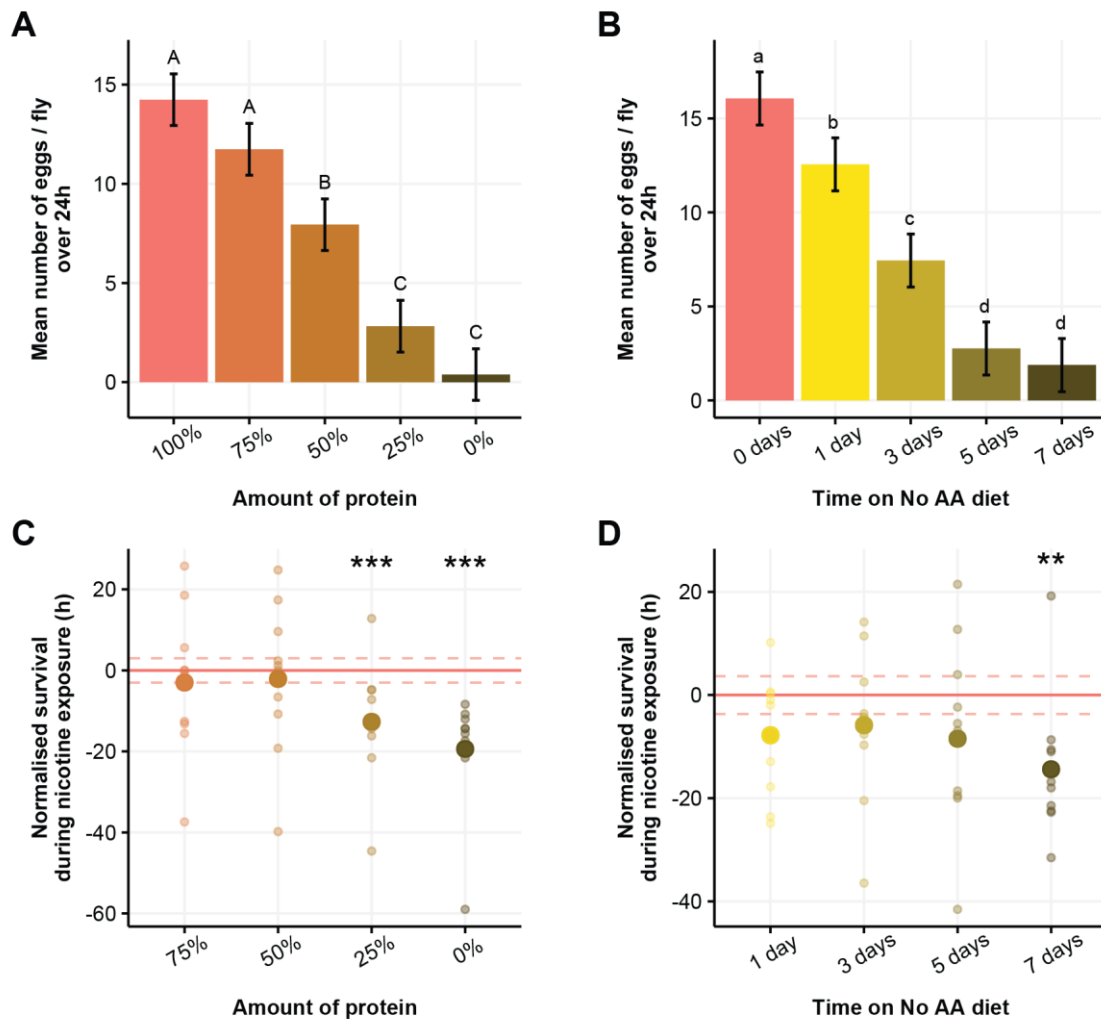

273

274 **Figure 3. Restricting all amino acids does not protect flies against nicotine.**

275 Flies were either pre-treated with diets where all amino acids were reduced for 7 days, or  
276 where all amino acids were absent for 1, 3, 5 or 7 days before chronic exposure to  
277 0.83mg/mL nicotine. **(A)** Mean number of eggs (+/- SE) per fly in the 24h before nicotine  
278 exposure when the concentration of amino acids is altered and **(B)** when all amino acids are  
279 removed for various days. **(C)** Survival time of pre-treated flies that has been normalised to  
280 survival of flies fed 100% of amino acids (red horizontal line +/- SE indicated by dashed red  
281 lines), small circles represent mean lifespan for each replicate and large circles representing  
282 the group mean. Flies tolerated nicotine less when they were pre-treated with diets that had  
283 25% or 0% of the amino acids found in the complete diet ( $P < 0.001$ ). **(D)** Survival time of  
284 pre-treated flies that has been normalised to survival of flies that were fed a complete diet

285 (red horizontal line +/- SE indicated by dashed red lines), small circles represent mean  
286 lifespan for each replicate and large circles representing the group mean. Flies were less  
287 resistant to nicotine when they were fed a diet lacking all amino acids for 7 days before  
288 exposure. \*\*\*P < 0.001, \*\* P < 0.01, \*P < 0.05.

289 **Table 2**

290 Differences in survival between flies that were pre-treated with diets that had reduced, or no  
291 protein compared to flies that were fed a nutritionally complete diet. Summary of cox-  
292 proportional hazards modelling. Confidence level = 95%.

| Terms                      | n  | Estimate | Z value        |
|----------------------------|----|----------|----------------|
| <b>Protein restriction</b> |    |          |                |
| 100% protein               | 50 | NA       | NA             |
| 75% protein (7 days)       | 50 | 0.098    | 0.48           |
| 50% protein (7 days)       | 50 | 0.102    | 0.5            |
| 25% protein (7 days)       | 50 | 0.681    | <b>3.33***</b> |
| 0% protein (7 days)        | 50 | 1.273    | <b>6.03***</b> |
| <b>No protein</b>          |    |          |                |
| 100% protein               | 50 | NA       | NA             |
| 1 day (0% protein)         | 50 | 0.309    | 1.5            |
| 3 days (0% protein)        | 50 | 0.296    | 1.44           |
| 5 days (0% protein)        | 45 | 0.380    | 1.79           |
| 7 days (0% protein)        | 50 | 0.633    | <b>3.05**</b>  |

\*\*\*p < 0.001, \*\*p < 0.01, \*p < 0.05



294 Assessing how availability and duration of methionine and leucine dilution  
295 impacts nicotine resistance

296           Given that restricting all amino acids proportionately did not protect flies from  
297 subsequent nicotine poisoning, we decided to return to exploring the benefits of restricting  
298 individual amino acids. In particular, we were interested in discovering the conditions that  
299 conferred the greatest benefit when restricting different amino acids. We previously found  
300 that the conditions that provided the maximum protection when isoleucine was altered were  
301 different to the conditions when threonine is altered (Fulton, Mirth, and Piper 2022).  
302 Specifically, removing isoleucine from the diet for 7 days was the most protective, whereas  
303 threonine only needed to be reduced to 25% to show the greatest protection against nicotine.  
304 In our initial screen, where we removed each amino acid individually, we found that there  
305 was no effect of depriving flies of either methionine or leucine, whereas removing any one of  
306 the other 8 essential amino acids for 7 days provided some degree of protection. This was  
307 particularly curious because other research describes the benefits from restricting these amino  
308 acids. Methionine restriction is strongly associated with longevity and increased metabolic  
309 health in flies, worms, and mice (Ables and Johnson 2017) and leucine is one of the three  
310 branched chain amino acids, and the other two, isoleucine and valine, both protected flies  
311 against nicotine when removed from the diet (Fulton, Mirth, and Piper 2022). As we have  
312 already shown that intensity of restriction and length of pre-treatment can impact the benefits  
313 of single amino acid restriction, we wanted to know whether there were conditions where  
314 flies were protected when we modified the availability of either methionine or leucine.

315           We individually restricted methionine or leucine to 75%, 50%, 25% or 0% of the  
316 amount in the complete diet. As we restricted the amount of these amino acids, we  
317 simultaneously modified duration of dietary pre-treatment to 7, 5, 3 or 1 day prior to nicotine  
318 exposure, resulting in a combination of 16 pre-treatment conditions plus a complete diet

319 control. In the 24h immediately before nicotine exposure, we measured the fecundity of these  
320 flies to further understand the relationship between toxin resistance and reproductive output.  
321 When we modified methionine, we found that the only condition that significantly altered egg  
322 laying was a diet completely lacking methionine for 7 days (Figure 4. A; Table 3). Although  
323 methionine is an essential amino acid, this result was unsurprising because egg laying has  
324 previously been shown to exhibit a slower decline after methionine removal than that of the  
325 other amino acids (Alves et al. 2022). When we removed leucine from the diet, we observed  
326 a proportional reduction in egg laying, where fecundity was reduced by approximately 2 eggs  
327 per female in the 24h measured for every additional day that flies spent on a leucine dropout  
328 (Figure 4. B; Table 3; Supplementary table 4). Interestingly, we saw that a 25% leucine diet  
329 had a less steep decline in egg laying of approximately 1 egg/female/24h for every additional  
330 day spent on this diet and this decline appeared to level out after 5 days spent on the diet.  
331 Neither 50% ( $P = 0.14$ ) nor 75% ( $P = 1$ ) had a noticeable change in egg laying over time.  
332 Together, these data indicate that the flies were experiencing restriction for each of these  
333 amino acids to differing extents, and reinforces that they are likely to have internal reserves  
334 of amino acids on which they can draw to sustain reproduction (Johnstone et al. 2024).

335 When pre-treated flies were exposed to nicotine, there was an interaction (2<sup>nd</sup> order  
336 polynomial) between the amount of methionine in the diet and how long the diet was fed to  
337 the flies that modified their survival (Table 4; Figure 4. C). The flies that lived the longest  
338 when exposed to nicotine were fed a diet of 25% methionine for 7 days before they were  
339 poisoned (mean survival 60.7h on nicotine) which was protective when compared to the  
340 complete medium (mean survival of 46.1h;  $P = 0.012$ ). This result further uncouples nicotine  
341 resistance and reproductive capacity, as the fecundity of these flies did not differ from that of  
342 the fully fed controls. When leucine was modified in the diet, the duration of pre-treatment  
343 did not significantly impact survival, only the amount of leucine (Table 4, Figure 4. D). The

344 flies that survived the longest were fed a 50% leucine diet for 5 days (mean survival 57h on  
345 nicotine), but this was not protective when compared to the complete diet (mean survival of  
346 46.1h;  $P = 0.09$ ). These results again signal that fly physiology responds in a specific way to  
347 each amino acid and the degree to which it varies, and that there is not a simple trade-off  
348 between reproduction and survival under toxic conditions.

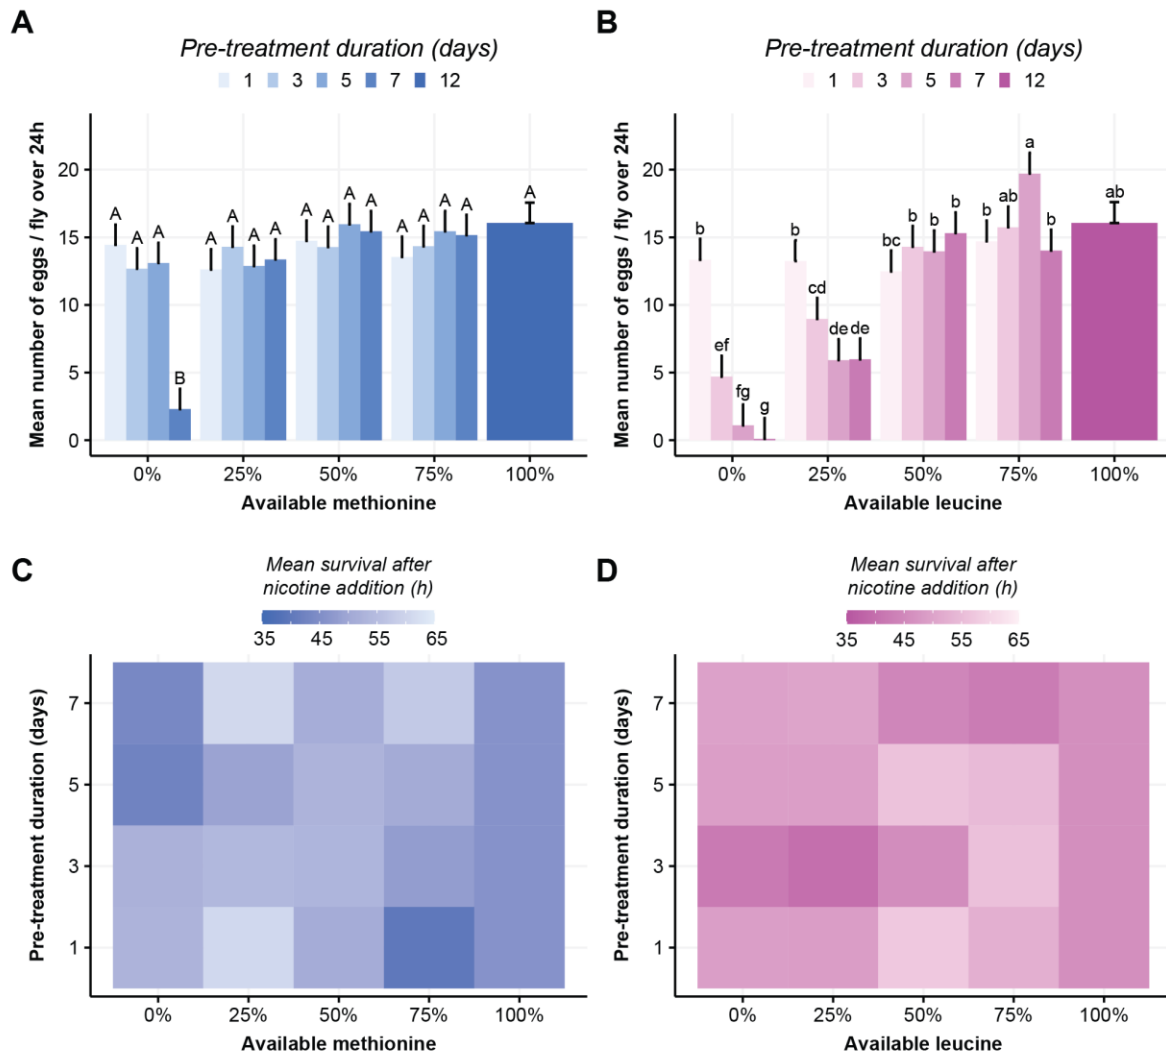

349

350 **Figure 4. Amino acid identity and availability modify protection against nicotine stress.**

351 Flies were pre-treated with diets containing 1 of 5 amounts of either methionine or leucine  
 352 (0%, 25%, 50%, 75%, 100%) for either 7, 5, 3, or 1 day before fecundity was measured and  
 353 flies were chronically exposed to 0.83mg/mL nicotine. (A) When dietary methionine was  
 354 modified, only a diet lacking methionine for 7 days reduced fecundity (B) However,  
 355 restricting dietary leucine resulted in females laying approximately 2 fewer eggs/24h for  
 356 every day she spent on a leucine dropout (95% CI [-2.57, -1.76]), 1 fewer egg/24h for every  
 357 day she spent on a 25% leucine diet (95% CI [-1.64, -0.84]), or no decline over time when fed  
 358 50% or more leucine ( $P > 0.1$ ). (C) Survival when methionine was modified was influenced  
 359 by both the amount of methionine and the duration of pre-treatment (Table 4), with a 25%  
 360 methionine for 7 days offering the greatest protection ( $P = 0.012$ ) (D) Leucine dose ( $P =$   
 361 0.02) but not pre-treatment duration ( $P = 0.59$ ) significantly impacted survival on nicotine,  
 362 although the longest lived flies - that were fed a 50% leucine diet for 5 days - were not

363 protected ( $P = 0.09$ ).  $N = 50$  flies for each combination of pre-treatment duration and  
364 available amino acid. Pre-treatment with 100% of each amino acid could not differ in  
365 duration time and  $N = 50$  flies for this group in total. The survival data has been normalised  
366 and represented in Supplementary Figure 2 to show variation in survival.

367 **Table 3**

368 ANOVA tables for the models that best reflect the relationships between egg production,  
369 duration of pre-treatment, focal amino acid, and the level that amino acid was restricted to.  
370 Both models: Eggs laid per fly  $\sim$  Duration \* Available amino acid.

| Terms                                          | Sum sq  | DF  | F value          |
|------------------------------------------------|---------|-----|------------------|
| <b>Methionine</b>                              |         |     |                  |
| Pre-treatment duration                         | 188.00  | 3   | <b>10.86***</b>  |
| Amino acid availability                        | 483.32  | 3   | <b>27.92***</b>  |
| Pre-treatment duration:Amino acid availability | 809.05  | 9   | <b>15.58***</b>  |
| Residuals                                      | 882.73  | 153 | NA               |
| <b>Leucine</b>                                 |         |     |                  |
| Pre-treatment duration                         | 446.72  | 3   | <b>24.4***</b>   |
| Amino acid availability                        | 3153.25 | 3   | <b>172.25***</b> |
| Pre-treatment duration:Amino acid availability | 1232.80 | 9   | <b>22.45***</b>  |
| Residuals                                      | 933.63  | 153 | NA               |

\*\*\* $p < 0.001$ , \*\* $p < 0.01$ , \* $p < 0.05$

371

372 **Table 4**

373 ANOVA tables for the models that best reflect the relationships between nicotine resistance,  
374 duration of pre-treatment, focal amino acid, and the level that amino acid was restricted to.

375 Methionine model: Age ~ poly(Duration, 2) \* poly(Available methionine, 2). Leucine model:

376 Age ~ Duration \* Available leucine.

| Terms                                                         | Sum sq     | DF  | F value           |
|---------------------------------------------------------------|------------|-----|-------------------|
| <b>Methionine</b>                                             |            |     |                   |
| (Intercept)                                                   | 1201158.83 | 1   | <b>1504.17***</b> |
| poly(Pre-treatment duration, 2)                               | 1714.61    | 2   | 1.07              |
| poly(Available methionine, 2)                                 | 6920.16    | 2   | <b>4.33*</b>      |
| poly(Pre-treatment duration, 2):poly(Available methionine, 2) | 11648.22   | 4   | <b>3.65**</b>     |
| Residuals                                                     | 671580.49  | 841 | NA                |
| <b>Leucine</b>                                                |            |     |                   |
| (Intercept)                                                   | 153093.98  | 1   | <b>190.22***</b>  |
| Pre-treatment duration                                        | 237.15     | 1   | 0.29              |
| Available leucine                                             | 4319.50    | 1   | <b>5.37*</b>      |
| Pre-treatment duration:Available leucine                      | 2283.02    | 1   | 2.84              |
| Residuals                                                     | 680894.02  | 846 | NA                |
| ***p < 0.001, **p < 0.01, *p < 0.05                           |            |     |                   |

378 Diets change how flies respond to different forms of stress.

379           Previously, we have explored how nicotine resistance can be modified by diet, though  
380 there are many ways to stress a fly, some of which have been linked to nutrition (Buchon,  
381 Silverman, and Cherry 2014; Rion and Kawecki 2007; Sgrò, Terblanche, and Hoffmann  
382 2016; Ristow and Schmeisser 2011). Given that there is not necessarily an obvious  
383 relationship between diet and nicotine resistance, we wondered whether the diets that protect  
384 against nicotine could protect against a broad spectrum of stressors. To explore this, we  
385 selected a panel of diets that were the most protective for a focal amino acid against nicotine  
386 and used them as pre-treatment before exposure to various stressors. This panel included 7-  
387 day treatment with either an isoleucine dropout, a 25% threonine diet, or a 25% methionine  
388 diet and, although it was not protective against nicotine, we also included a 5-day, 50%  
389 leucine pre-treatment condition. As controls, we included a complete diet as a reference and a  
390 diet lacking all amino acids and only investigated the effects of these diets using female flies  
391 due to the differences we found between male and female response to diet.

392           *Oxidative stress (paraquat)*

393           Paraquat (N, N'-dimethyl-4,4'-bipyridinium dichloride) is commonly used to induce  
394 oxidative stress in *Drosophila*. Paraquat reacts in vivo to ultimately produce a superoxide  
395 anion, which is a reactive oxygen species (ROS) that can cause damage to lipids, proteins,  
396 and DNA (Suntres 2002). ROS can also be produced endogenously as a result of normal  
397 mitochondrial function (Sarniak et al. 2016), meaning that it is important for organisms to  
398 have systems to mitigate the effects of ROS. To see if we could potentially prime these  
399 systems with diet, flies were pre-treated with our panel of diets and then chronically exposed  
400 to 10mM paraquat in their food. We found that diet modified paraquat resistance ( $\chi^2_5 = 60.0$ ,  
401  $P < 0.001$ ), but only the isoleucine dropout pre-treatment protected flies against paraquat ( $P <$   
402  $0.001$ ; Figure 5. A; Table 5). We also found that a diet lacking all amino acids reduced flies'

403 capacity to resolve oxidative stress ( $P = 0.003$ ). These data hint that there might be effects of  
404 isoleucine deprivation that are not elicited by other types of amino acid restriction.

#### 405 *Starvation*

406 A well-established method for increasing starvation resistance in flies is nutrient  
407 restriction. This could be in the form of dietary restriction (Chippindale, Chu, and Rose  
408 1996), protein restriction (Leroi, Kim, and Rose 1994), or even single amino acid deprivation  
409 (Srivastava et al. 2022). This is hypothesised to result from flies responding to these diets by  
410 reducing their reproductive output and in turn, storing nutrients such as fats which can be  
411 used to maintain life when starved (Rion and Kawecki 2007). When we starved flies after our  
412 single amino acid pre-treatments, we found that diet affected survival ( $\chi^2_5 = 74.9$ ,  $P < 0.001$ ).  
413 Specifically, we found that an isoleucine dropout diet, a 25% threonine diet, or a 25%  
414 methionine diet increased starvation resistance (Figure 5. B; Table 5). Flies that were pre-  
415 treated with either a protein free diet or a 50% leucine diet responded to starvation no  
416 differently than the fully fed control flies. Given that we have shown that a 25% methionine  
417 diet does not reduce fecundity and increases starvation resistance, and that a diet lacking  
418 amino acids reduces fecundity but does not protect against starvation, our data suggest that  
419 fecundity is not simply traded for starvation resistance.

#### 420 *Cold shock*

421 In nature, organisms are faced with thermal challenges such as extremely cold or hot  
422 conditions to which they must evolve resistance or tolerance. Time to wake up after chill  
423 coma is a trait that is often measured in the context of population plasticity in the face of  
424 climate change (David et al. 1998), but subsequent survival in the following days is not  
425 always measured. Here, we measured both. We found that pre-treatment diet impacted both  
426 recovery time ( $\chi^2_5 = 28.8$ ,  $P < 0.001$ ) and survival following cold shock ( $\chi^2_5 = 53.2$ ,  $P <$   
427  $0.001$ ). However, none of our pre-treatment diets improved chill-coma recovery time (Figure



428 5. C; Table 5), in fact, a 25% methionine or a 50% leucine diet increased the time it took for  
429 flies to wake. However, we found that flies pre-treated with an isoleucine dropout, a 25%  
430 threonine, or a protein-free diet lived longer in the 5 days following cold shock (Figure 5. D;  
431 Table 5). When we examined the data across all pre-treatment groups, we discovered that  
432 there is an overall correlation between recovery time and survival post cold shock ( $P < 0.001$ ,  
433 Pearson's correlation coefficient = -0.24). However, the pre-treatment diets that improved  
434 survival following cold shock did not differ in their recovery time from the complete diet.  
435 These results highlight that flies can recover at the same rate from chill coma, but this is not  
436 necessarily an indication of their health status, as many die in the following days. They also  
437 indicate that pre-treatment diets can improve the health status of flies following cold shock  
438 without influencing recovery time.

#### 439 *Heat knockdown*

440 On the other end of the thermal spectrum from cold shock is heat shock. In the face of  
441 climate change, animals are facing increasing temperatures and so understanding their upper  
442 thermal limit is an important indicator of stress resistance with implications for population  
443 persistence (Hoffmann, Chown, and Clusella-Trullas 2013). It is more typical however to  
444 manipulate the diet of flies during their development than during adulthood, and there is a  
445 link between larval diet and upper thermal tolerance (Andersen et al. 2010; Sisodia and Singh  
446 2012). We were therefore interested to know whether there is a similar link between heat  
447 tolerance and our adult pre-treatment diets. We found that pre-treatment diet affected heat  
448 knockdown time ( $\chi^2_5 = 35.3$ ,  $P < 0.001$ ), though none of our pre-treatment diets enhanced  
449 heat tolerance when compared to the complete diet (Figure 5. E; Table 5). In fact, flies that  
450 were pre-treated with a 25% threonine diet or a 50% leucine diet were more susceptible to  
451 heat knockdown than the complete diet. These results indicate that the mechanisms by which  
452 these diets are protecting flies against nicotine are not generalisable across all types of stress.

453 ***Infection with E. faecalis***

454 We were also interested to know whether our diets could protect flies against a biotic  
455 stress. To do this, we opted to prick flies with live *Enterococcus faecalis*, a bacterium that  
456 naturally colonises the gastrointestinal tract of flies (Cox and Gilmore 2007). Enterococci are  
457 a leading cause of nosocomial infections in humans (Sood et al. 2008), and *E. faecalis* is  
458 routinely used to infect *Drosophila* and study host-pathogen interactions (Lazzaro, Sackton,  
459 and Clark 2006; Chapman et al. 2020; Cabrera et al. 2023). When we infected flies with *E.*  
460 *faecalis*, we found that pre-treatment diet overall did not impact survival ( $\chi^2_5 = 9.6$ ,  $P <$   
461  $0.09$ ). Though when we compared survival between different pre-treatment diets and the  
462 complete diet, we found that a diet lacking amino acids increased susceptibility to the  
463 pathogen (Figure 5. F; Table 5). When we infected the flies, we were also interested to know  
464 whether pre-treatment diet could impact fecundity under infection, as we expected that the  
465 energy that would be expended on laying eggs would need to be diverted to resolve the  
466 infection. However, we did not see any evidence for this, and flies that were infected had  
467 indistinguishable egg laying dynamics to control flies for each pre-treatment (Figure 6; Table  
468 6; Supplementary table 5). Together, these results show that the ways that diet can protect  
469 against nicotine poisoning are not the same for infection with *E. faecalis*.

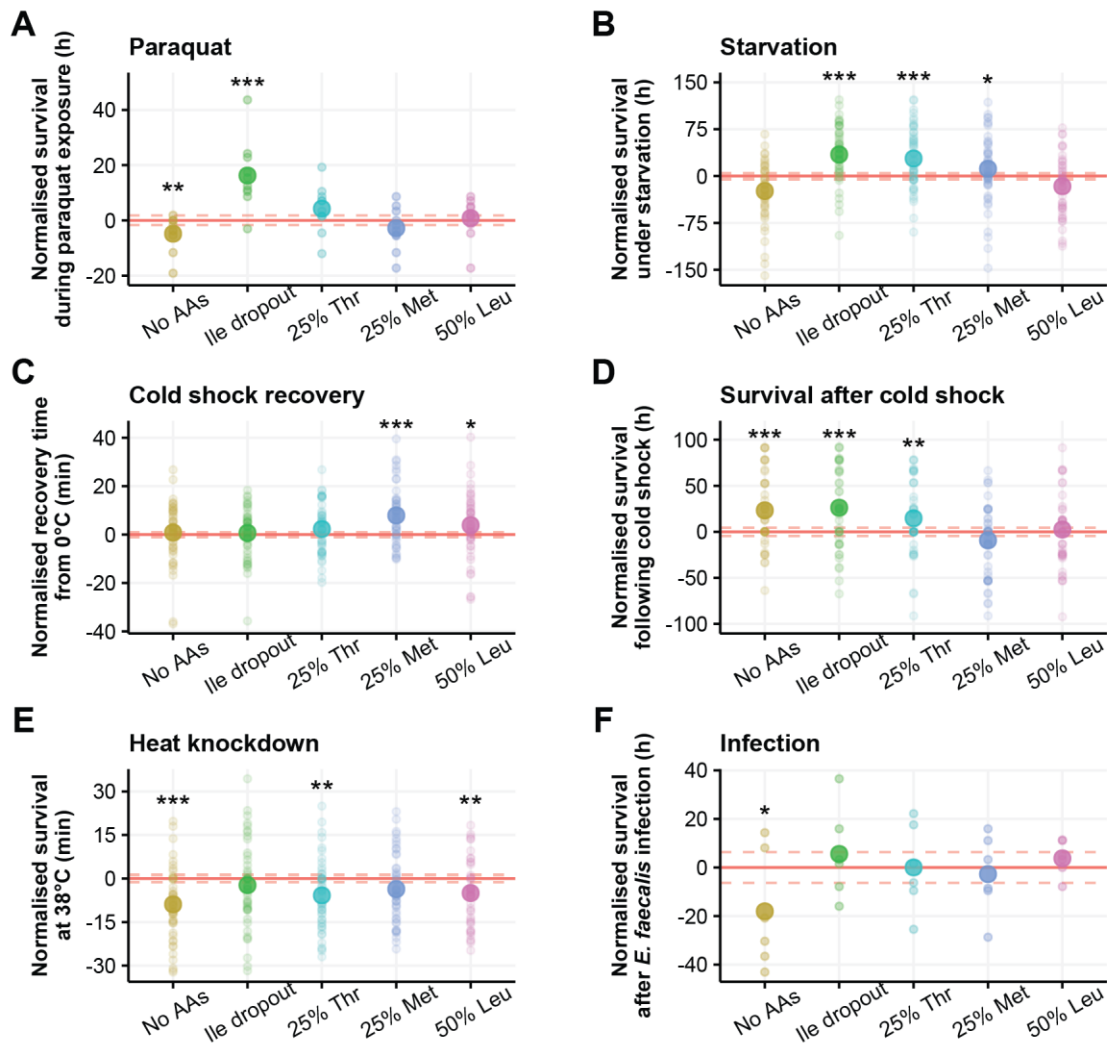

470

471 **Figure 5. Manipulating individual dietary amino acids can differentially change how**  
472 **flies respond to stress.**

473 Flies were pre-treated with one of six diets before being exposed to a physical stress. Survival  
474 is represented as the difference between pre-treated flies and the controls, which were fed a  
475 nutritionally complete diet (red horizontal line +/- SE indicated by dashed red lines), small  
476 circles represent mean lifespan for each replicate and large circles represent the group mean.  
477 (A) Flies that were pre-treated with an isoleucine dropout were more resistant to 10mM  
478 paraquat ( $P < 0.001$ ), and removing all amino acids reduced paraquat resistance ( $P = 0.003$ ).  
479 (B) Starvation resistance was increased by pre-treating flies with an isoleucine dropout ( $P <$   
480  $0.001$ ) or a diet containing either 25% threonine ( $P < 0.001$ ) or methionine ( $P < 0.05$ ). (C)  
481 When cold shocked flies were transferred to room temperature, the flies that were pre-treated  
482 with either a 25% methionine diet ( $P < 0.001$ ) or a 50% leucine diet ( $P = 0.01$ ) took longer to  
483 recover, (D) However, the survival of these flies following cold shock was no different from  
484 the complete diet ( $P > 0.2$ ). Survival after cold shock was improved when flies were pre-

485 treated with a diet lacking all amino acids ( $P < 0.001$ ), an isoleucine dropout diet ( $P < 0.001$ ),  
486 or a 25% threonine diet ( $P = 0.004$ ). (E) Pre-treatment diets that lack all amino acids ( $P <$   
487  $0.001$ ) - or contain only 25% threonine ( $P = 0.002$ ) or 50% leucine ( $P = 0.002$ ) - increase  
488 susceptibility to heat knockdown. (F) Flies that were pre-treated with a diet lacking amino  
489 acids were more susceptible to infection with *E. faecalis*. The number of individuals varied  
490 between 29-50 flies per pre-treatment group for each experiment (Table 5). \*\*\* $P < 0.001$ , \*\*  
491  $P < 0.01$ , \* $P < 0.05$ .

492 **Table 5**

493 Summary table for survival of pre-treated flies compared to control flies across multiple stressors. Control flies were fed a nutritionally complete  
 494 diet. Summary of cox-proportional hazards modelling. Confidence level = 95%.

| Terms         | Paraquat |          |                | Starvation |          |                 | Heat knockdown |          |                | Cold recovery |          |                 | Cold survival |          |                 | Infection |          |              |
|---------------|----------|----------|----------------|------------|----------|-----------------|----------------|----------|----------------|---------------|----------|-----------------|---------------|----------|-----------------|-----------|----------|--------------|
|               | n        | Estimate | Z value        | n          | Estimate | Z value         | n              | Estimate | Z value        | n             | Estimate | Z value         | n             | Estimate | Z value         | n         | Estimate | Z value      |
| Complete diet | 48       | NA       | NA             | 41         | NA       | NA              | 49             | NA       | NA             | 48            | NA       | NA              | 50            | NA       | NA              | 30        | NA       | NA           |
| No AAs        | 48       | 0.601    | <b>2.95**</b>  | 44         | 0.349    | 1.58            | 49             | 1.137    | <b>5.46***</b> | 49            | -0.108   | -0.53           | 50            | -1.155   | <b>-3.5***</b>  | 30        | 0.845    | <b>2.14*</b> |
| Ile dropout   | 49       | -0.936   | <b>-4.4***</b> | 48         | -1.230   | <b>-5.14***</b> | 49             | 0.182    | 0.89           | 47            | -0.060   | -0.29           | 50            | -1.529   | <b>-4.04***</b> | 30        | -0.292   | -0.62        |
| 25% Thr       | 50       | -0.357   | -1.76          | 48         | -0.861   | <b>-3.84***</b> | 50             | 0.637    | <b>3.14**</b>  | 47            | -0.359   | -1.74           | 49            | -0.887   | <b>-2.83**</b>  | 30        | 0.074    | 0.17         |
| 25% Met       | 50       | 0.273    | 1.35           | 48         | -0.559   | <b>-2.54*</b>   | 49             | 0.313    | 1.53           | 48            | -0.920   | <b>-4.37***</b> | 50            | 0.315    | 1.3             | 29        | 0.120    | 0.28         |
| 50% Leu       | 47       | -0.039   | -0.19          | 46         | 0.284    | 1.31            | 50             | 0.628    | <b>3.08**</b>  | 50            | -0.520   | <b>-2.56*</b>   | 50            | -0.044   | -0.18           | 30        | -0.075   | -0.17        |

\*\*\*p < 0.001, \*\*p < 0.01, \*p < 0.05

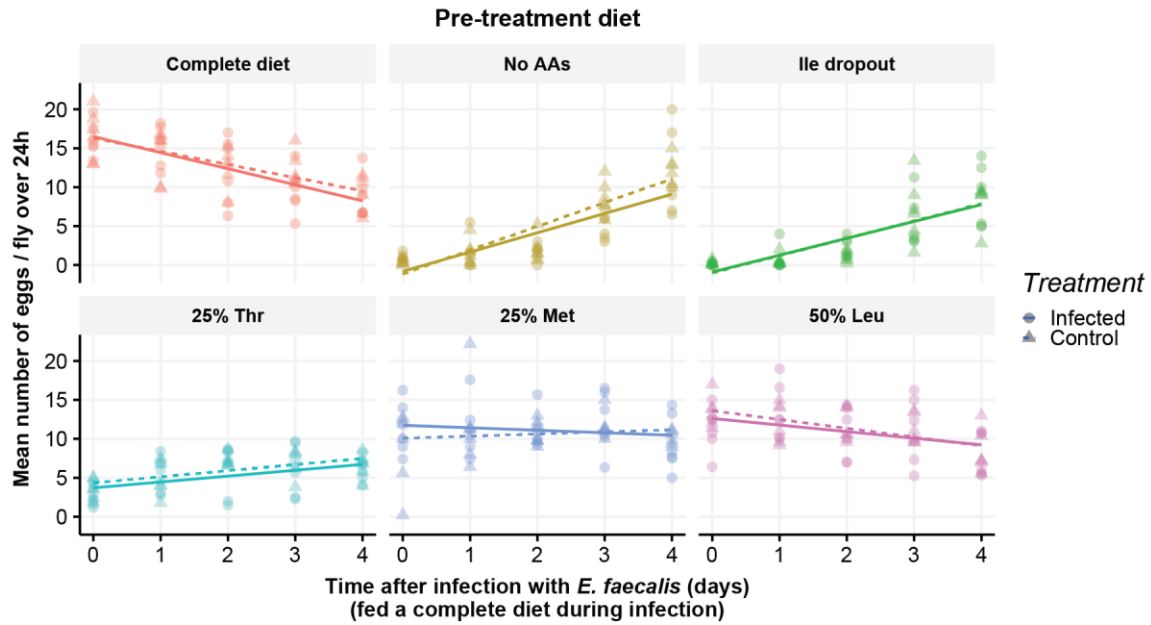

496

497 **Figure 6. Pre-treatment diet did not influence fecundity during infection.**

498 Flies were pre-treated with one of six diets before being infected with *E. faecalis* and  
499 transferred onto a complete diet. The trends in egg laying between infected (solid lines) and  
500 control (dashed lines) flies were not different from each other across the pre-treatment diets.  
501 The number of individuals for each condition was 30 flies.

502 **Table 6**

503 ANOVA table for the model that looks for interactions between the number of eggs laid by  
504 infected and control females: Eggs laid per fly ~ Pre-treatment diet \* Infection status \* Time  
505 after infection.

| Terms                                                    | Sum sq  | DF  | F value          |
|----------------------------------------------------------|---------|-----|------------------|
| (Intercept)                                              | 2723.49 | 1   | <b>348.51***</b> |
| Pre-treatment diet                                       | 2786.36 | 5   | <b>71.31***</b>  |
| Infection status                                         | 0.21    | 1   | 0.03             |
| Time after infection                                     | 255.81  | 1   | <b>32.73***</b>  |
| Pre-treatment diet:Infection status                      | 21.21   | 5   | 0.54             |
| Pre-treatment diet:Time after infection                  | 942.11  | 5   | <b>24.11***</b>  |
| Infection status:Time after infection                    | 4.14    | 1   | 0.53             |
| Pre-treatment diet:Infection status:Time after infection | 18.07   | 5   | 0.46             |
| Residuals                                                | 2625.76 | 336 | NA               |

\*\*\*p < 0.001, \*\*p < 0.01, \*p < 0.05

506

## 507 Discussion

508           In this manuscript, we showed that there is sexual dimorphism in the protection  
509 afforded by short-term individual amino acid deprivation, and that the protection cannot be  
510 mimicked by manipulating the total protein in the diet. Moreover, we found further evidence  
511 that there are different optimal pre-treatments for each amino acid to increase stress  
512 resistance of the consumer. Finally, we showed that different pre-treatment diets could  
513 protect flies against different stressors to different extents. This research furthers our  
514 understanding of the benefits that are conferred by amino acid-restricted diets and offers  
515 insights into the complex relationship between nutrition and stress resistance.

516           In our previous work, we found that diets lacking an essential amino acid protected  
517 female flies from subsequent nicotine poisoning. It is particularly common in studies that  
518 investigate diet using fruit flies to only experiment with females, as changes in diet lead to  
519 rapid, observable changes in fecundity (Sang and King 1961). Several studies have also  
520 observed larger effect sizes of diet on females than males which is generally attributed to  
521 females eating more than males to sustain their reproductive output (Partridge, Piper, and  
522 Mair 2005; Wong et al. 2009). Given this information, we assumed that males would also  
523 receive the benefits of an isoleucine dropout, but perhaps to a lesser degree than females.  
524 This was not the case however, and instead we found that short-term isoleucine deprivation  
525 reduced the nicotine resistance of males. Interestingly, fully-fed males were more tolerant to  
526 nicotine than fully-fed females, which is surprising given that young females typically have  
527 greater resistance to a range of stressors than the same age males (Belyi et al. 2020). This  
528 could reflect a difference in initial investment capabilities of the sexes, as the females in our  
529 experiments were mated and so were committed to a greater reproductive investment than the  
530 males.



531 It is also possible that these differences could reflect the difference in food, and so  
532 toxin, consumption by male and female flies (Lee, Kim, and Min 2013). Differentiating  
533 between these possibilities could be addressed by administering nicotine using capillary  
534 feeders that would permit precise quantification of toxin ingestion (Ja et al. 2007;  
535 Diegelmann et al. 2017). It is also possible that the combinations that benefit females simply  
536 do not benefit males, and that the sexes have different responses to diet. Given that the  
537 identity of the focal amino acids, as well as the degree of restriction and pre-treatment  
538 duration all interact to impact female nicotine resistance, it is likely that sex also modifies this  
539 response.

540 To understand this, we should investigate the differences in molecular responses to  
541 isoleucine deprivation between males and females. Previous research has shown sex-specific  
542 transcriptional responses across high and low protein diets, implying that the output of  
543 nutrient sensing pathways is different between male and female flies (Camus, Piper, and  
544 Reuter 2019). It is important that we understand the physiological differences in responses to  
545 diet between sexes if we are to make any suggestions about diet improving human health in  
546 the future.

547 The benefits of chronic protein restriction, including both lifespan and health span  
548 extension, have been documented across a wide range of taxa (Mirzaei, Suarez, and Longo  
549 2014). Recently, the acute benefits of protein restriction have also come to light. For  
550 example, mice are more resistant to hepatic and renal ischaemic reperfusion injury, which are  
551 models of liver and kidney surgery respectively, when they have been fed protein restricted  
552 pre-treatment diets (Harputlugil et al. 2014; Robertson et al. 2015). Similarly, protein  
553 restriction protects flies against hydrogen peroxide, an oxidising agent, and also protects old  
554 flies against infection with *E. faecalis* (Zhang et al. 2023). Since restricting an individual  
555 amino acid protects flies against nicotine, it was surprising to find that protein restriction by

556 restricting all dietary amino acids did not also protect flies. It is possible, therefore, that flies  
557 require one or more of the remaining non-focal amino acids to be supplied in the diet to  
558 establish resistance.

559         A potential contender for this amino acid is leucine, since no methods of leucine  
560 restriction protected flies against nicotine. It would be interesting to know if restricting all  
561 amino acids except leucine is beneficial, or if the benefits of combining nicotine-protective  
562 diets (ie. food lacking isoleucine, with 25% threonine, 25% methionine, and containing  
563 leucine) is more protective than any single amino acid restriction alone. The current  
564 framework of research mainly focuses on observing the protective effects of protein or  
565 dietary restriction (Emran et al. 2014; Joußen et al. 2008), but our work emphasises that  
566 dietary restriction and individual amino acid restriction are not equivalent, and sometimes  
567 amino acid restriction is protective when other types of restriction are not. Thus, there is  
568 merit in altering the levels of individual dietary amino acids even when there is no, or  
569 negative, effects of other dietary restrictions.

570         A common theme from our data is that short term isoleucine deprivation was the most  
571 common way to protect flies against stressors. Isoleucine restriction has recently garnered  
572 more attention than that of other amino acids, because of the generally protective effects that  
573 result from restricting its intake. When it is restricted in the diet, female flies live longer  
574 (Weaver et al. 2023) and so do male and female heterogenous mice, who also have improved  
575 metabolic health (Green et al. 2023). We also recently found that female flies subjected to  
576 two short bouts of isoleucine deprivation have extended lifespan (Fulton et al. 2024). A  
577 potential explanation for this is that isoleucine deprivation triggers protective systems that  
578 bolster defence against a broad spectrum of damage threats and that these mechanisms  
579 overlap with those that improve lifespan. One possibility is a link between detoxification  
580 capacity and longevity; detoxification genes are strongly upregulated in long-lived insulin

581 mutants (McElwee et al. 2007) and insulin mutant flies are more resistant to DDT (Gronke et  
582 al. 2010). Since flies were not protected by removing isoleucine at the same time as the other  
583 amino acids (ie. no protein treatment), we propose that protection requires new protein  
584 synthesis. New proteins would surely require isoleucine and this could possibly be made  
585 available by recycling amino acid stores via protein breakdown (Johnstone et al. 2024). If this  
586 is the case, then these stored amino acids must somehow be reserved for somatic protection,  
587 rather than for use in egg production, which ceases when any essential amino acid is removed  
588 from the diet (Sang and King 1961; Alves et al. 2022). Studies tracking the fate of labelled  
589 amino acids into protein during isoleucine deprivation could be revealing, both for  
590 understanding the systems that are triggered to enhance stress resistance as well as to identify  
591 protein synthesis that is required to sustain lifespan.

592         Another factor that animals encounter in the wild is changes in temperature. It is  
593 particularly important for ectotherms to be aware of cues that signify a temperature change  
594 since they cannot regulate their own body temperature, and so must respond physiologically  
595 to ensure survival (Angilletta Jr, Niewiarowski, and Navas 2002). Interestingly, we found  
596 nicotine-protective diets that reduced fecundity also increased survival following cold shock.  
597 This trade-off could be explained by the availability of sterols, essential micronutrients that  
598 modulate cell membrane fluidity (Dufourc 2008), which are speculated to be important in  
599 mitigating mechanical injury to cell membranes during cold shock (Teets and Denlinger  
600 2013). Flies that are fed more cholesterol during development can have enhanced cold  
601 tolerance (Shreve, Yi, and Lee 2007; Allen et al. 2024) and the trade-off between lifespan and  
602 reproduction can be rescued by supplementing cholesterol (Zanco et al. 2021), allowing flies  
603 to have long lives and high fecundity. Taken together, it is possible that reduced fecundity  
604 due to essential amino acid deprivation increases body sterol stores, and this modifies cell  
605 membranes in a way that protects flies against acute cold shock. If this were the case, we

606 would expect that supplementing adult flies with cholesterol would also protect them against  
607 cold shock, even when fed a high protein diet.

608 We also found that there was some overlap between diets that protected against  
609 survival following a cold shock and starvation. This could be explained by the changing of  
610 seasons. Winter is associated with reduced temperatures and availability of nutrition and  
611 evolving resistance to both simultaneously should be adaptive. Interestingly, flies that are  
612 evolved for chill coma recovery have higher levels of phosphatidic acids, but not  
613 triacylglyceride (TAG) or lipid levels (Ko et al. 2019). We found that the TAG levels of flies  
614 that were pre-treated with an isoleucine dropout or a 25% threonine diet were not different  
615 from controls fed a complete diet, but both of these pre-treatment diets protect against  
616 starvation and cold stress. It would be interesting to look at the levels of phosphatidic acids in  
617 our pre-treated flies as a possible mechanism for cross-protection against starvation and cold  
618 stress.

619 Previously, we have found that rapamycin, a drug that inhibits Target of Rapamycin  
620 (TOR), protected fully-fed flies against nicotine to the same degree as isoleucine deprivation  
621 (Fulton, Mirth, and Piper 2022). As TOR is a master regulator of growth, which detects  
622 cellular levels of amino acids and is inactivated by low levels of amino acids (Saxton and  
623 Sabatini 2017), we assumed that both isoleucine deprivation and rapamycin achieved nicotine  
624 resistance through TOR suppression. However, other studies have shown that rapamycin  
625 treatment improves heat tolerance of wildtype flies (Willot et al. 2023) and can improve the  
626 maximum thermal temperature (CTmax) withstood by DGRP flies (Rohde et al. 2021). We  
627 therefore anticipated that short term isoleucine deprivation would also increase heat tolerance  
628 in our flies, but it did not. Interestingly, other work has also shown that flies under dietary  
629 protein restriction are less heat tolerant (Emran et al. 2014). While dietary protein restriction  
630 and rapamycin treatment are thought to increase lifespan through TOR suppression (Partridge

631 et al. 2011; Kapahi, Kaeberlein, and Hansen 2017), these data suggest that the molecular  
632 changes induced by rapamycin treatment are overlapping with those induced by isoleucine or  
633 protein restriction, but not the same. It would be interesting to investigate the molecular  
634 responses to isoleucine deprivation and rapamycin treatment to understand how their overlaps  
635 and differences shape the way these treatments enhance resistance to various stressors as well  
636 as enhance lifespan.

## 637 Conclusion

638 Our study sheds light on the intricate relationship and trade-offs between nutrition and  
639 stress resistance in *Drosophila melanogaster*. We have demonstrated that short-term amino  
640 acid restrictions, particularly isoleucine deprivation, can protect against various stressors,  
641 including nicotine poisoning, oxidative stress, starvation, and cold shock. We observed  
642 sexual dimorphism in the response to dietary manipulation, with females, but not males,  
643 benefiting from isoleucine deprivation. Our findings also highlight the differences between  
644 total protein restriction and individual amino acid restriction, emphasising the importance of  
645 considering specific amino acids in diet manipulation studies. Future investigations into the  
646 molecular responses to dietary interventions and their implications for stress resistance across  
647 multiple stressors will provide valuable insights into optimising health span and resilience  
648 across species.

## 649 References

- 650 Ables, G. P., and J. E. Johnson. 2017. 'Pleiotropic responses to methionine restriction',  
651 *Experimental Gerontology*, 94: 83-88.
- 652 Allen, Mitchell C., Marshall W. Ritchie, Mahmoud I. El-Saadi, and Heath A. MacMillan.  
653 2024. 'Effects of a high cholesterol diet on chill tolerance are highly context-dependent in  
654 *Drosophila*', *Journal of Thermal Biology*, 119: 103789.
- 655 Alves, André N, Carla M Sgrò, Matthew DW Piper, and Christen K Mirth. 2022. 'Target of  
656 Rapamycin Drives Unequal Responses to Essential Amino Acid Depletion for Egg Laying in  
657 *Drosophila Melanogaster*', *Frontiers in cell and developmental biology*, 10: 822685.
- 658 Andersen, Laila H, Torsten N Kristensen, Volker Loeschcke, Søren Toft, and David Mayntz.  
659 2010. 'Protein and carbohydrate composition of larval food affects tolerance to thermal stress  
660 and desiccation in adult *Drosophila melanogaster*', *Journal of Insect Physiology*, 56: 336-40.
- 661 Angilletta Jr, Michael J, Peter H Niewiarowski, and Carlos A Navas. 2002. 'The evolution of  
662 thermal physiology in ectotherms', *Journal of Thermal Biology*, 27: 249-68.
- 663 Bass, T. M., R. C. Grandison, R. Wong, P. Martinez, L. Partridge, and M. D. Piper. 2007.  
664 'Optimization of dietary restriction protocols in *Drosophila*', *Journals of Gerontology. Series*  
665 *A: Biological Sciences and Medical Sciences*, 62: 1071-81.
- 666 Belyi, Alexei A, Alexey A Alekseev, Alexander Y Fedintsev, Stepan N Balybin, Ekaterina N  
667 Proshkina, Mikhail V Shaposhnikov, and Alexey A Moskalev. 2020. 'The resistance of  
668 *Drosophila melanogaster* to oxidative, genotoxic, proteotoxic, osmotic stress, infection, and  
669 starvation depends on age according to the stress factor', *Antioxidants*, 9: 1239.
- 670 Brandhorst, S., M. Wei, S. Hwang, T. E. Morgan, and V. D. Longo. 2013. 'Short-term calorie  
671 and protein restriction provide partial protection from chemotoxicity but do not delay glioma  
672 progression', *Experimental Gerontology*, 48: 1120-8.
- 673 Buchon, Nicolas, Neal Silverman, and Sara Cherry. 2014. 'Immunity in *Drosophila*  
674 *melanogaster*—from microbial recognition to whole-organism physiology', *Nature reviews*  
675 *immunology*, 14: 796-810.
- 676 Cabrera, Kevin, Duncan S Hoard, Olivia Gibson, Daniel I Martinez, and Zeba Wunderlich.  
677 2023. '*Drosophila* immune priming to *Enterococcus faecalis* relies on immune tolerance  
678 rather than resistance', *PLoS Pathogens*, 19: e1011567.
- 679 Camus, M Florencia, Matthew DW Piper, and Max Reuter. 2019. 'Sex-specific  
680 transcriptomic responses to changes in the nutritional environment', *Elife*, 8: e47262.

- 681 Chapman, Joanne R, Maureen A Dowell, Rosanna Chan, and Robert L Unckless. 2020. 'The  
682 genetic basis of natural variation in *Drosophila melanogaster* immune defense against  
683 *Enterococcus faecalis*', *Genes*, 11: 234.
- 684 Chippindale, Adam K., Terence J. F. Chu, and Michael R. Rose. 1996. 'COMPLEX TRADE-  
685 OFFS AND THE EVOLUTION OF STARVATION RESISTANCE IN *DROSOPHILA*  
686 *MELANOGASTER*', *Evolution*, 50: 753-66.
- 687 Cox, Christopher R, and Michael S Gilmore. 2007. 'Native microbial colonization of  
688 *Drosophila melanogaster* and its use as a model of *Enterococcus faecalis* pathogenesis',  
689 *Infection and Immunity*, 75: 1565-76.
- 690 David, R Jean, Patricia Gibert, Eliane Pla, Georges Petavy, Dev Karan, and Brigitte  
691 Moreteau. 1998. 'Cold stress tolerance in *Drosophila*: analysis of chill coma recovery in *D.*  
692 *melanogaster*', *Journal of Thermal Biology*, 23: 291-99.
- 693 Diegelmann, S., A. Jansen, S. Jois, K. Kastenholz, L. Velo Escarcena, N. Strudthoff, and H.  
694 Scholz. 2017. 'The CApillary FEeder Assay Measures Food Intake in *Drosophila*  
695 *melanogaster*', *Journal of visualized experiments : JoVE*: 55024.
- 696 Dufourc, Erick J. 2008. 'Sterols and membrane dynamics', *Journal of Chemical Biology*, 1:  
697 63-77.
- 698 Emran, S., M. Yang, X. He, J. Zandveld, and M. D. Piper. 2014. 'Target of rapamycin  
699 signalling mediates the lifespan-extending effects of dietary restriction by essential amino  
700 acid alteration', *Aging*, 6: 390-8.
- 701 Fontana, L., N. E. Cummings, S. I. Arriola Apelo, J. C. Neuman, I. Kasza, B. A. Schmidt, E.  
702 Cava, F. Spelta, V. Tosti, F. A. Syed, E. L. Baar, N. Veronese, S. E. Cottrell, R. J. Fenske, B.  
703 Bertozzi, H. K. Brar, T. Pietka, A. D. Bullock, R. S. Figenshau, G. L. Andriole, M. J.  
704 Merrins, C. M. Alexander, M. E. Kimple, and D. W. Lamming. 2016. 'Decreased  
705 Consumption of Branched-Chain Amino Acids Improves Metabolic Health', *Cell Reports*,  
706 16: 520-30.
- 707 Fox, J, and S Weisberg. 2019. 'An R Companion to Applied Regression, Third Edition.  
708 Thousand Oaks CA: Sage. URL:<https://socialsciences.mcmaster.ca/jfox/Books/Companion/>.'
- 709 Fulton, Tahlia L, Christen K Mirth, and Matthew DW Piper. 2022. 'Restricting a single amino  
710 acid cross-protects *Drosophila melanogaster* from nicotine poisoning through mTORC1 and  
711 GCN2 signalling', *Open Biology*, 12: 220319.
- 712 Fulton, Tahlia L, Mia R Wansbrough, Christen K Mirth, and Matthew DW Piper. 2024.  
713 'Short-term fasting of a single amino acid extends lifespan', *GeroScience*: 1-9.

- 714 Grandison, R. C., M. D. Piper, and L. Partridge. 2009. 'Amino-acid imbalance explains  
715 extension of lifespan by dietary restriction in *Drosophila*', *Nature*, 462: 1061-4.
- 716 Green, Cara L., Michaela E. Trautman, Krittisak Chaiyakul, Raghav Jain, Yasmine H. Alam,  
717 Reji Babygirija, Heidi H. Pak, Michelle M. Sonsalla, Mariah F. Calubag, Chung-Yang Yeh,  
718 Anneliese Bleicher, Grace Novak, Teresa T. Liu, Sarah Newman, Will A. Ricke, Kristina A.  
719 Matkowskyj, Irene M. Ong, Cholsoon Jang, Judith Simcox, and Dudley W. Lamming. 2023.  
720 'Dietary restriction of isoleucine increases healthspan and lifespan of genetically  
721 heterogeneous mice', *Cell Metabolism*, 35: 1976-95.e6.
- 722 Gronke, S., D. F. Clarke, S. Broughton, T. D. Andrews, and L. Partridge. 2010. 'Molecular  
723 evolution and functional characterization of *Drosophila* insulin-like peptides', *Plos Genetics*,  
724 6: e1000857.
- 725 Harputlugil, E., C. Hine, D. Vargas, L. Robertson, B. D. Manning, and J. R. Mitchell. 2014.  
726 'The TSC complex is required for the benefits of dietary protein restriction on stress  
727 resistance *in vivo*', *Cell Reports*, 8: 1160-70.
- 728 Hoffmann, Ary A, Steven L Chown, and Susana Clusella-Trullas. 2013. 'Upper thermal limits  
729 in terrestrial ectotherms: how constrained are they?', *Functional Ecology*, 27: 934-49.
- 730 Holliday, Robin. 1989. 'Food, reproduction and L'ongevity: Is the extended lifespan of  
731 calorie-restricted animals an evolutionary adaptation?', *Bioessays*, 10: 125-27.
- 732 Hothorn, T., F. Bretz, and P. Westfall. 2008. 'Simultaneous inference in general parametric  
733 models', *Biometrical Journal*, 50: 346-63.
- 734 Ja, W. W., G. B. Carvalho, E. M. Mak, N. N. de la Rosa, A. Y. Fang, J. C. Liong, T.  
735 Brummel, and S. Benzer. 2007. 'Prandiology of *Drosophila* and the CAFE assay',  
736 *Proceedings of the National Academy of Sciences of the United States of America*, 104: 8253-  
737 6.
- 738 Johnson, J. E., and F. B. Johnson. 2014. 'Methionine restriction activates the retrograde  
739 response and confers both stress tolerance and lifespan extension to yeast, mouse and human  
740 cells', *PloS One*, 9: e97729.
- 741 Johnstone, Joshua N, Christen K Mirth, Travis K Johnson, Ralf B Schittenhelm, and Matthew  
742 DW Piper. 2024. 'GCN2 mediates access to stored amino acids for somatic maintenance  
743 during *Drosophila* ageing', *bioRxiv*.
- 744 Jongbloed, F., T. C. Saat, M. Verweij, C. Payan-Gomez, J. H. Hoeijmakers, S. van den Engel,  
745 C. T. van Oostrom, G. Ambagtsheer, S. Imholz, J. L. Pennings, H. van Steeg, I. Jzermans JN,  
746 M. E. Dolle, and R. W. de Bruin. 2017. 'A signature of renal stress resistance induced by  
747 short-term dietary restriction, fasting, and protein restriction', *Scientific Reports*, 7: 40901.



748 Joußen, Nicole, David G Heckel, Matthias Haas, Ingolf Schuphan, and Burkhard Schmidt.  
749 2008. 'Metabolism of imidacloprid and DDT by P450 CYP6G1 expressed in cell cultures of  
750 *Nicotiana tabacum* suggests detoxification of these insecticides in Cyp6g1-overexpressing  
751 strains of *Drosophila melanogaster*, leading to resistance', *Pest Management Science*, 64: 65-  
752 73.

753 Kapahi, Pankaj, Matt Kaeberlein, and Malene Hansen. 2017. 'Dietary restriction and lifespan:  
754 Lessons from invertebrate models', *Ageing Research Reviews*, 39: 3-14.

755 Kaunisto, Sirpa, Laura V Ferguson, and Brent J Sinclair. 2016. 'Can we predict the effects of  
756 multiple stressors on insects in a changing climate?', *Current Opinion in Insect Science*, 17:  
757 55-61.

758 Khalil, Sarah, Eliana Jacobson, Moria C Chambers, and Brian P Lazzaro. 2015. 'Systemic  
759 bacterial infection and immune defense phenotypes in *Drosophila melanogaster*', *JoVE*  
760 (*Journal of Visualized Experiments*): e52613.

761 Ko, Li, Lawrence Harshman, Sandra Hangartner, Ary Hoffmann, Steve Kachman, and Paul  
762 Black. 2019. 'Changes in lipid classes of *Drosophila melanogaster* in response to selection  
763 for three stress traits', *Journal of Insect Physiology*, 117: 103890.

764 Krittika, S., and P. Yadav. 2020. 'Dietary protein restriction deciphers new relationships  
765 between lifespan, fecundity and activity levels in fruit flies *Drosophila melanogaster*',  
766 *Scientific Reports*, 10: 10019.

767 Lazzaro, Brian P, Timothy B Sackton, and Andrew G Clark. 2006. 'Genetic variation in  
768 *Drosophila melanogaster* resistance to infection: a comparison across bacteria', *Genetics*,  
769 174: 1539-54.

770 Lee, Kwang Pum, Jong-Seok Kim, and Kyung-Jin Min. 2013. 'Sexual dimorphism in nutrient  
771 intake and life span is mediated by mating in *Drosophila melanogaster*', *Animal Behaviour*,  
772 86: 987-92.

773 Lee, Kwang Pum, Stephen J Simpson, Fiona J Clissold, Robert Brooks, J William O Ballard,  
774 Phil W Taylor, Nazaneen Soran, and David Raubenheimer. 2008. 'Lifespan and reproduction  
775 in *Drosophila*: new insights from nutritional geometry', *Proceedings of the National*  
776 *Academy of Sciences*, 105: 2498-503.

777 Lenth, R. 2021. 'emmeans: Estimated Marginal Means, aka Least-Squares Means. R package  
778 version 1.7.0. <https://CRAN.R-project.org/package=emmeans>'.

779 Leroi, Armand M, Sung B Kim, and Michael R Rose. 1994. 'The evolution of phenotypic  
780 life-history trade-offs: an experimental study using *Drosophila melanogaster*', *The American*  
781 *Naturalist*, 144: 661-76.

782 Linford, N. J., C. Bilgir, J. Ro, and S. D. Pletcher. 2013. 'Measurement of lifespan in  
783 *Drosophila melanogaster*', *Journal of visualized experiments : JoVE*.

784 Magwere, Tapiwanashe, Tracey Chapman, and Linda Partridge. 2004. 'Sex differences in the  
785 effect of dietary restriction on life span and mortality rates in female and male *Drosophila*  
786 *melanogaster*', *The Journals of Gerontology Series A: Biological Sciences and Medical*  
787 *Sciences*, 59: B3-B9.

788 McElwee, J. J., E. Schuster, E. Blanc, M. D. Piper, J. H. Thomas, D. S. Patel, C. Selman, D.  
789 J. Withers, J. M. Thornton, L. Partridge, and D. Gems. 2007. 'Evolutionary conservation of  
790 regulated longevity assurance mechanisms', *Genome Biology*, 8: R132.

791 Miller, R. A., G. Buehner, Y. Chang, J. M. Harper, R. Sigler, and M. Smith-Wheelock. 2005.  
792 'Methionine-deficient diet extends mouse lifespan, slows immune and lens aging, alters  
793 glucose, T4, IGF-I and insulin levels, and increases hepatocyte MIF levels and stress  
794 resistance', *Aging Cell*, 4: 119-25.

795 Mirzaei, H., R. Raynes, and V. D. Longo. 2016. 'The conserved role of protein restriction in  
796 aging and disease', *Current Opinion in Clinical Nutrition and Metabolic Care*, 19: 74-9.

797 Mirzaei, H., J. A. Suarez, and V. D. Longo. 2014. 'Protein and amino acid restriction, aging  
798 and disease: from yeast to humans', *Trends in Endocrinology and Metabolism*, 25: 558-66.

799 Partridge, Linda, Nazif Alic, Ivana Bjedov, and Matt DW Piper. 2011. 'Ageing in  
800 *Drosophila*: the role of the insulin/Igf and TOR signalling network', *Experimental*  
801 *gerontology*, 46: 376-81.

802 Partridge, Linda, David Gems, and Dominic J Withers. 2005. 'Sex and death: what is the  
803 connection?', *Cell*, 120: 461-72.

804 Partridge, Linda, Matthew D. W. Piper, and William Mair. 2005. 'Dietary restriction in  
805 *Drosophila*', *Mechanisms of Ageing and Development*, 126: 938-50.

806 Peng, W., L. Robertson, J. Gallinetti, P. Mejia, S. Vose, A. Charlip, T. Chu, and J. R.  
807 Mitchell. 2012. 'Surgical stress resistance induced by single amino acid deprivation requires  
808 *Gcn2* in mice', *Science Translational Medicine*, 4: 118ra11.

809 Piper, M. D., E. Blanc, R. Leitao-Goncalves, M. Yang, X. He, N. J. Linford, M. P. Hoddinott,  
810 C. Hopfen, G. A. Soutoukis, C. Niemeyer, F. Kerr, S. D. Pletcher, C. Ribeiro, and L.  
811 Partridge. 2014. 'A holidic medium for *Drosophila melanogaster*', *Nat Methods*, 11: 100-5.

812 Piper, M. D. W., G. A. Soutoukis, E. Blanc, A. Mesaros, S. L. Herbert, P. Juricic, X. He, I.  
813 Atanassov, H. Salmonowicz, M. Yang, S. J. Simpson, C. Ribeiro, and L. Partridge. 2017.  
814 'Matching Dietary Amino Acid Balance to the In Silico-Translated Exome Optimizes Growth  
815 and Reproduction without Cost to Lifespan', *Cell Metab*, 25: 610-21.

- 816 Rion, Stéphanie, and Tadeusz J Kawecki. 2007. 'Evolutionary biology of starvation  
817 resistance: what we have learned from *Drosophila*', *Journal of Evolutionary Biology*, 20:  
818 1655-64.
- 819 Ristow, Michael, and Sebastian Schmeisser. 2011. 'Extending life span by increasing  
820 oxidative stress', *Free Radical Biology and Medicine*, 51: 327-36.
- 821 Robertson, L. T., J. H. Trevino-Villarreal, P. Mejia, Y. Grondin, E. Harputlugil, C. Hine, D.  
822 Vargas, H. Zheng, C. K. Ozaki, B. S. Kristal, S. J. Simpson, and J. R. Mitchell. 2015. 'Protein  
823 and Calorie Restriction Contribute Additively to Protection from Renal Ischemia Reperfusion  
824 Injury Partly via Leptin Reduction in Male Mice', *Journal of Nutrition*, 145: 1717-27.
- 825 Rohde, Palle Duun, Asbjørn Bøcker, Caroline Amalie Bastholm Jensen, Anne Louise  
826 Bergstrøm, Morten Ib Juul Madsen, Sandra Læsø Christensen, Steffan Balling Villadsen, and  
827 Torsten Nygaard Kristensen. 2021. 'Genotype and Trait Specific Responses to Rapamycin  
828 Intake in *Drosophila melanogaster*', *Insects*, 12: 474.
- 829 Sang, James H., and Robert C. King. 1961. 'Nutritional Requirements of Axenically Cultured  
830 *Drosophila Melanogaster* Adults', *Journal of Experimental Biology*, 38: 793-809.
- 831 Sarniak, Agata, Joanna Lipińska, Karol Tytman, and Stanisława Lipińska. 2016. 'Endogenous  
832 mechanisms of reactive oxygen species (ROS) generation', *Advances in Hygiene and  
833 Experimental Medicine*, 70: 1150-65.
- 834 Saxton, Robert A, and David M Sabatini. 2017. 'mTOR signaling in growth, metabolism, and  
835 disease', *Cell*, 168: 960-76.
- 836 Sgrò, Carla M, John S Terblanche, and Ary A Hoffmann. 2016. 'What can plasticity  
837 contribute to insect responses to climate change?', *Annual Review of Entomology*, 61: 433-51.
- 838 Shreve, Scott M, Shu-Xia Yi, and Richard E Lee. 2007. 'Increased dietary cholesterol  
839 enhances cold tolerance in *Drosophila melanogaster*', *Cryoletters*, 28: 33-37.
- 840 Sinclair, Brent J, Laura V Ferguson, Golnaz Salehipour-Shirazi, and Heath A MacMillan.  
841 2013. 'Cross-tolerance and cross-talk in the cold: relating low temperatures to desiccation and  
842 immune stress in insects', *Integrative and Comparative Biology*, 53: 545-56.
- 843 Sisodia, Seema, and Bashisth N Singh. 2012. 'Experimental evidence for nutrition regulated  
844 stress resistance in *Drosophila ananassae*'.
- 845 Sood, Seema, Meenakshi Malhotra, BK Das, and Arti Kapil. 2008. 'Enterococcal infections  
846 & antimicrobial resistance', *Indian Journal of Medical Research*, 128: 111-21.
- 847 Soultoukis, George A, and Linda Partridge. 2016. 'Dietary protein, metabolism, and aging',  
848 *Annual Review of Biochemistry*, 85: 5-34.

849 Srivastava, Anchal, Jiongming Lu, Dennis Said Gadalla, Oliver Hendrich, Sebastian Grönke,  
850 and Linda Partridge. 2022. 'The Role of GCN2 Kinase in Mediating the Effects of Amino  
851 Acids on Longevity and Feeding Behaviour in *Drosophila*', *Frontiers in Aging*, 3.  
852 Suntres, Zacharias E. 2002. 'Role of antioxidants in paraquat toxicity', *Toxicology*, 180: 65-  
853 77.  
854 Team, R Core. 2021. 'R: A language and environment for statistical computing. R Foundation  
855 for Statistical Computing, Vienna, Austria. URL <https://www.R-project.org/>.'

856 Team, RStudio. 2020. 'RStudio: Integrated Development for R. RStudio', *PBC, Boston, MA*  
857 URL <http://www.rstudio.com/>.

858 Teets, Nicholas M., and David L. Denlinger. 2013. 'Physiological mechanisms of seasonal  
859 and rapid cold-hardening in insects', *Physiological Entomology*, 38: 105-16.  
860 Therneau, T. 2021. 'A Package for Survival Analysis in R. R package version 3.2-11, URL  
861 <https://CRAN.R-project.org/package=survival>.'

862 Trautman, M. E., N. E. Richardson, and D. W. Lamming. 2022. 'Protein restriction and  
863 branched-chain amino acid restriction promote geroprotective shifts in metabolism', *Aging*  
864 *Cell*, 21: e13626.

865 Trocha, K., P. Kip, M. R. MacArthur, S. J. Mitchell, A. Longchamp, J. H. Trevino-Villarreal,  
866 M. Tao, M. A. Bredella, K. De Amorim Bernstein, J. R. Mitchell, and C. K. Ozaki. 2019.  
867 'Preoperative Protein or Methionine Restriction Preserves Wound Healing and Reduces  
868 Hyperglycemia', *Journal of Surgical Research*, 235: 216-22.

869 Weaver, K. J., R. A. Holt, E. Henry, Y. Lyu, and S. D. Pletcher. 2023. 'Effects of hunger on  
870 neuronal histone modifications slow aging in *Drosophila*', *Science*, 380: 625-32.

871 Wickham, H. 2016. 'ggplot2: Elegant Graphics for Data Analysis. Springer-Verlag New  
872 York.'

873 Willot, Quentin, Andre du Toit, Sholto de Wet, Elizabeth J. Huisamen, Ben Loos, and John  
874 S. Terblanche. 2023. 'Exploring the connection between autophagy and heat-stress tolerance  
875 in *Drosophila melanogaster*', *Proceedings of the Royal Society B: Biological Sciences*, 290:  
876 20231305.

877 Wong, Richard, Matthew DW Piper, Bregje Wertheim, and Linda Partridge. 2009.  
878 'Quantification of food intake in *Drosophila*', *PloS One*, 4: e6063.

879 Yap, Y. W., P. M. Rusu, A. Y. Chan, B. C. Fam, A. Jungmann, S. M. Solon-Biet, C. K.  
880 Barlow, D. J. Creek, C. Huang, R. B. Schittenhelm, B. Morgan, D. Schmoll, B. Kiens, M. D.  
881 W. Piper, M. Heikenwalder, S. J. Simpson, S. Broer, S. Andrikopoulos, O. J. Muller, and A.

882 J. Rose. 2020. 'Restriction of essential amino acids dictates the systemic metabolic response  
883 to dietary protein dilution', *Nat Commun*, 11: 2894.

884 Yeh, C. Y., L. C. S. Chini, M. S. Gallagher, J. W. Davidson, I. T. Freichels, M. F. Calubag,  
885 A. C. Rodgers, C. L. Green, R. Babygirija, M. M. Sonsalla, H. H. Pak, M. Trautman, T. A.  
886 Hacker, J. Simcox, and D. W. Lamming. 2023. 'Restricting dietary protein or dietary  
887 isoleucine improves metabolic health in aged mice', *bioRxiv*.

888 Zanco, Brooke, Christen K Mirth, Carla M Sgrò, and Matthew DW Piper. 2021. 'A dietary  
889 sterol trade-off determines lifespan responses to dietary restriction in *Drosophila*  
890 *melanogaster* females', *Elife*, 10: e62335.

891 Zhang, Wei, Yunshuang Ye, Yinan Sun, Yongxuan Li, Mingxia Ge, Kangning Chen, Liping  
892 Yang, Guijun Chen, and Jumin Zhou. 2023. 'Protein Restriction Effects on Healthspan and  
893 Lifespan in *Drosophila melanogaster* Are Additive With a Longevity-Promoting Diet', *The*  
894 *Journals of Gerontology: Series A*, 78: 2251-59.

895

## 896 Acknowledgements

897 We would like to thank Professor Damian Dowling and Professor Carla Sgro for sharing their  
898 equipment for heat and cold shocking flies, and Dr Winston Yee for assisting us to set up  
899 these thermal tolerance assays.

## 900 Supplementary materials

### 901 **Supplementary table 1**

902 Ingredients in 1L of Sugar Yeast (SY) medium.

| Ingredient                    | Amount (L <sup>-1</sup> ) | Supplier (catalogue number)   |
|-------------------------------|---------------------------|-------------------------------|
| Sugar                         | 50g                       | Bundaberg Australia (M180919) |
| Autolysed Brewer's yeast      | 100g                      | MP Biomedicals (290331225)    |
| Agar (grade J3)               | 10g                       | Gelita Australia (A-181017)   |
| Nipagin (10% w/v in 96% EtOH) | 30mL                      | Sigma Aldrich (W271004)       |
| Propionic acid                | 3mL                       | Merck (8.00605)               |

903

904 **Supplementary table 2**

905 Ingredients in 1L of complete synthetic medium.

| Ingredient      | Amount (L <sup>-1</sup> ) | Supplier (catalogue number) |
|-----------------|---------------------------|-----------------------------|
| L-arginine HCl  | 0.814g                    | Sigma Aldrich (A5131)       |
| L-alanine       | 0.551g                    | Sigma Aldrich (A7627)       |
| L-asparagine    | 0.514g                    | Sigma Aldrich (A0884)       |
| L-aspartic acid | 0.586g                    | Sigma Aldrich (A6683)       |
| L-cysteine      | 0.171g                    | Sigma Aldrich (C7477)       |
| L-glutamic acid | 0.759g                    | Sigma Aldrich (G5889)       |
| L-glutamine     | 0.560g                    | Sigma Aldrich (G3126)       |
| Glycine         | 0.383g                    | Sigma Aldrich (G7126)       |
| L-histidine     | 0.327g                    | Sigma Aldrich (H8000)       |
| L-isoleucine    | 0.560g                    | Sigma Aldrich (I2752)       |
| L-leucine       | 1.020g                    | Sigma Aldrich (L8912)       |
| L-lysine HCl    | 0.682g                    | Sigma Aldrich (L5626)       |
| L-methionine    | 0.301g                    | Sigma Aldrich (M9625)       |
| L-phenylalanine | 0.504g                    | Sigma Aldrich (P2126)       |
| L-proline       | 0.489g                    | Sigma Aldrich (P0380)       |
| L-serine        | 0.688g                    | Sigma Aldrich (S4500)       |
| L-threonine     | 0.552g                    | Sigma Aldrich (T8625)       |
| L-tryptophan    | 0.160g                    | Sigma Aldrich (T0254)       |
| L-tyrosine      | 0.460g                    | Sigma Aldrich (T8566)       |
| L-valine        | 0.599g                    | Sigma Aldrich (V0500)       |
| Agar            | 7.00g                     | Sigma Aldrich (A7002)       |
| Sucrose         | 17.12g                    | Sigma Aldrich (S1888)       |

|                                       |         |                                 |
|---------------------------------------|---------|---------------------------------|
| Cholesterol                           | 0.3g    | Glentham Life Sciences (GE0100) |
| Choline chloride                      | 0.05g   | Sigma Aldrich (C1879)           |
| Myo-inositol                          | 0.005g  | Sigma Aldrich (I7508)           |
| Inosine                               | 0.065g  | Sigma Aldrich (I4125)           |
| Uridine                               | 0.060g  | Sigma Aldrich (U3750)           |
| Thiamine                              | 0.0014g | Sigma Aldrich (T4625)           |
| Riboflavin                            | 0.0007g | Sigma Aldrich (R4500)           |
| Nicotinic acid                        | 0.0084g | Sigma Aldrich (N4126)           |
| Ca pantothenate                       | 0.0108g | Sigma Aldrich (21210)           |
| Pyridoxine-HCl                        | 0.0017g | Sigma Aldrich (P9755)           |
| Biotin                                | 0.0001g | Sigma Aldrich (B4501)           |
| Folic acid                            | 0.0005g | Sigma Aldrich (F7876)           |
| CaCl <sub>2</sub> .2H <sub>2</sub> O  | 0.250g  | Sigma Aldrich (C7902)           |
| CuSO <sub>4</sub> .5H <sub>2</sub> O  | 0.0025g | Sigma Aldrich (C7631)           |
| FeSO <sub>4</sub> .7H <sub>2</sub> O  | 0.025g  | Sigma Aldrich (F7002)           |
| MgSO <sub>4</sub> (anhydrous)         | 0.250g  | Sigma Aldrich (M7506)           |
| MnCl <sub>2</sub> .4H <sub>2</sub> O  | 0.001g  | Sigma Aldrich (M3634)           |
| Zn SO <sub>4</sub> .7H <sub>2</sub> O | 0.025g  | Sigma Aldrich (Z0251)           |
| KH <sub>2</sub> PO <sub>4</sub>       | 3.00g   | Sigma Aldrich (P9791)           |
| NaHCO <sub>3</sub>                    | 1.00g   | Sigma Aldrich (S8875)           |
| Acetic acid (glacial)                 | 3mL     | Merck KGaA (100063)             |
| Propionic acid                        | 6mL     | Merck KGaA (8.00605)            |
| Nipagin (10% w/v in 96% EtOH)         | 15mL    | Sigma Aldrich (W271004)         |

907 **Supplementary table 3**

908 Details for the toxins used in experiments. Nicotine laced vials were prepared by aliquoting  
909 100 $\mu$ L of diluted nicotine (in absolute ethanol, 25mg/mL) onto 3mL of cooled, complete  
910 synthetic food. Paraquat laced media were prepared by aliquoting 100 $\mu$ L of diluted paraquat  
911 (in water, 200mM) onto 2mL of cooled, complete synthetic food.

| Toxin                                               | Supplier<br>(Catalogue number) | Solvent                  | Working<br>concentration | Final<br>concentration |
|-----------------------------------------------------|--------------------------------|--------------------------|--------------------------|------------------------|
| Nicotine<br>(free base)                             | Merck KGaA<br>(22083-74-5)     | Absolute<br>ethanol      | 25mg/mL                  | 0.83mg/mL              |
| Paraquat (Methyl<br>viologen<br>dichloride hydrate) | Merck KGaA<br>(75365-73-0)     | MilliQ<br>filtered water | 200mM                    | 10mM                   |

912

913 **Supplementary table 4**

914 Trends in egg laying over time spent on leucine restricted diets. Estimates have been  
915 generated using emtrends, and the grouping was determined using multcomp's compact letter  
916 display. Conditions belonging to the same group have not been shown to be the same, only  
917 that they are not different. Confidence level = 95%.

| Amount of leucine | Trend | SE  | df  | Lower conf. | Upper conf. | Group |
|-------------------|-------|-----|-----|-------------|-------------|-------|
| 0%                | -2.17 | 0.2 | 161 | -2.57       | -1.76       | a     |
| 25%               | -1.24 | 0.2 | 161 | -1.64       | -0.84       | b     |
| 75%               | 0.10  | 0.2 | 161 | -0.31       | 0.50        | c     |
| 50%               | 0.41  | 0.2 | 161 | 0.01        | 0.81        | c     |

Tukey's adjustment for multiple comparisons. Confidence level = 0.95

918



919 **Supplementary table 5**

920 The estimated linear egg laying trend for infected and control flies, separated by pre-  
 921 treatment diet. Estimates generated by emtrends (Lenth 2021). Confidence level = 95%.

| <b>Pre-treatment diet</b>                                            | Trend estimate | Lower conf. | Upper conf. | Significance |
|----------------------------------------------------------------------|----------------|-------------|-------------|--------------|
| <b>Complete diet</b>                                                 |                |             |             |              |
| Infected                                                             | -2.06          | -2.77       | -1.35       |              |
| Control                                                              | -1.69          | -2.40       | -0.98       | NS           |
| <b>No AAs</b>                                                        |                |             |             |              |
| Infected                                                             | 2.48           | 1.77        | 3.19        |              |
| Control                                                              | 3.05           | 2.34        | 3.76        | NS           |
| <b>Ile dropout</b>                                                   |                |             |             |              |
| Infected                                                             | 2.17           | 1.46        | 2.88        |              |
| Control                                                              | 2.21           | 1.50        | 2.92        | NS           |
| <b>25% Thr</b>                                                       |                |             |             |              |
| Infected                                                             | 0.75           | 0.04        | 1.46        |              |
| Control                                                              | 0.78           | 0.07        | 1.49        | NS           |
| <b>25% Met</b>                                                       |                |             |             |              |
| Infected                                                             | -0.32          | -1.03       | 0.39        |              |
| Control                                                              | 0.27           | -0.44       | 0.98        | NS           |
| <b>50% Leu</b>                                                       |                |             |             |              |
| Control                                                              | -1.12          | -1.83       | -0.41       |              |
| Infected                                                             | -0.85          | -1.56       | -0.14       | NS           |
| Tukey's adjustment for multiple comparisons. Confidence level = 0.95 |                |             |             |              |

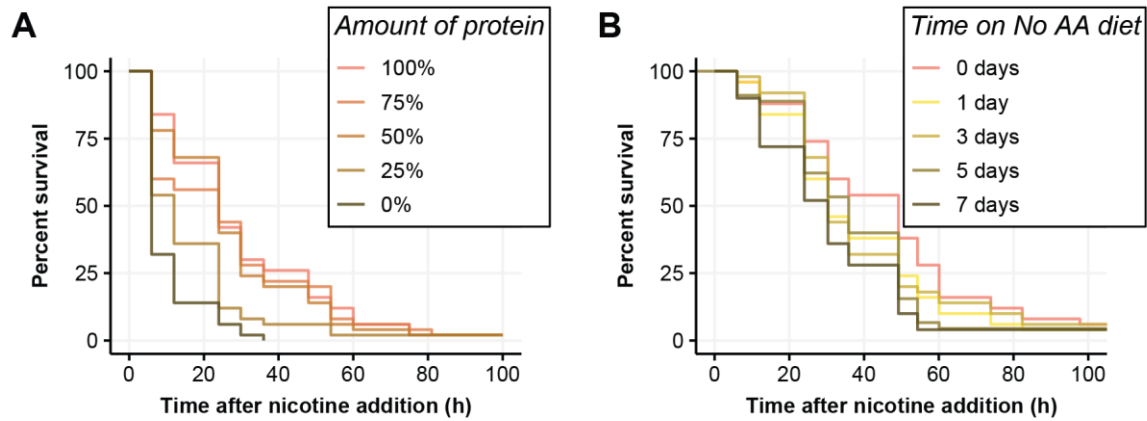

923

924 **Supplementary Figure 1.**

925 Flies were either pre-treated with diets where all amino acids were reduced for 7 days, or  
926 where all amino acids were absent for 1, 3, 5 or 7 days before chronic exposure to  
927 0.83mg/mL nicotine. **(A)** Survival curves of flies when pre-treated with diets that have  
928 altered amino acid concentrations, survival was reduced when flies were pre-treated with  
929 25% or 0% amino acids ( $P < 0.001$ ). **(B)** Survival curves when flies were pre-treated with no  
930 amino acids for 0, 1, 3, 5 or 7 days before nicotine exposure. Flies were more susceptible to  
931 nicotine when fed no amino acids for 7 days before poisoning.

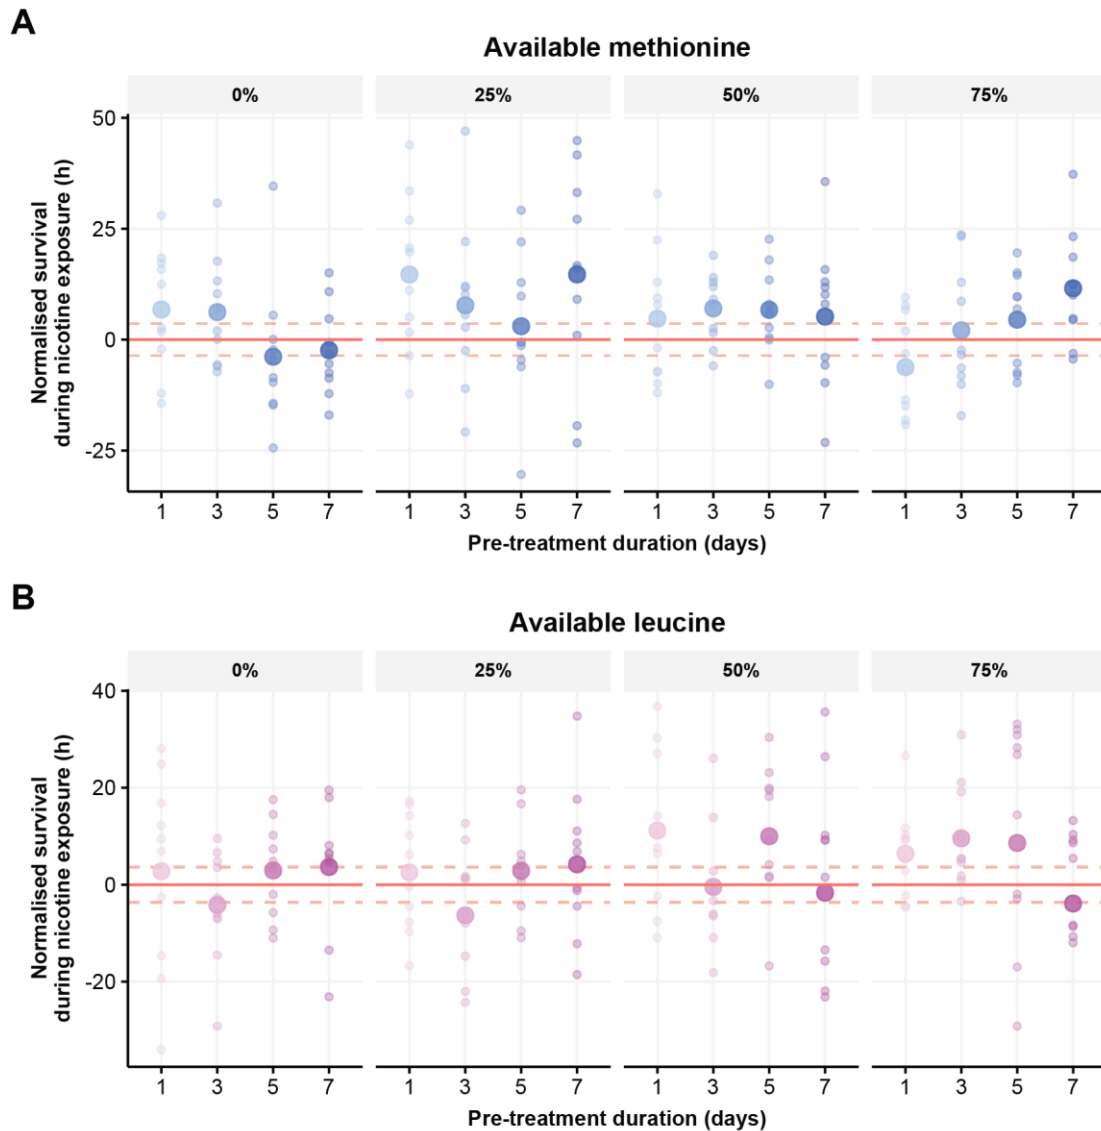

932

### 933 **Supplementary Figure 2**

934 Identity of amino acid interacts with level of restriction and duration of pre-treatment to  
935 respond to nicotine poisoning. Flies were pre-treated with diets containing 1 of 5 amounts of  
936 either methionine or leucine (0%, 25%, 50%, 75%, 100%) for either 7, 5, 3, or 1 day before  
937 chronic exposure to 0.83mg/mL nicotine. (A) Survival time of pre-treated flies that has been  
938 normalised to survival of flies fed 100% of amino acids (red horizontal line +/- SE indicated  
939 by dashed red lines), small circles represent mean lifespan for each replicate and large circles  
940 representing the group mean. Survival when methionine was modified was influenced by  
941 both the amount of methionine and the duration of pre-treatment (Table 4), with a 25%  
942 methionine for 7 days offering the greatest protection ( $P = 0.012$ ) (B) Leucine dose ( $P = 0.02$ )  
943 but not pre-treatment duration ( $P = 0.59$ ) significantly impacted survival on nicotine,

944 although the longest lived flies - that were fed a 50% leucine diet for 5 days - were not  
945 protected ( $P = 0.09$ ).  $N = 50$  flies per pre-treatment condition.

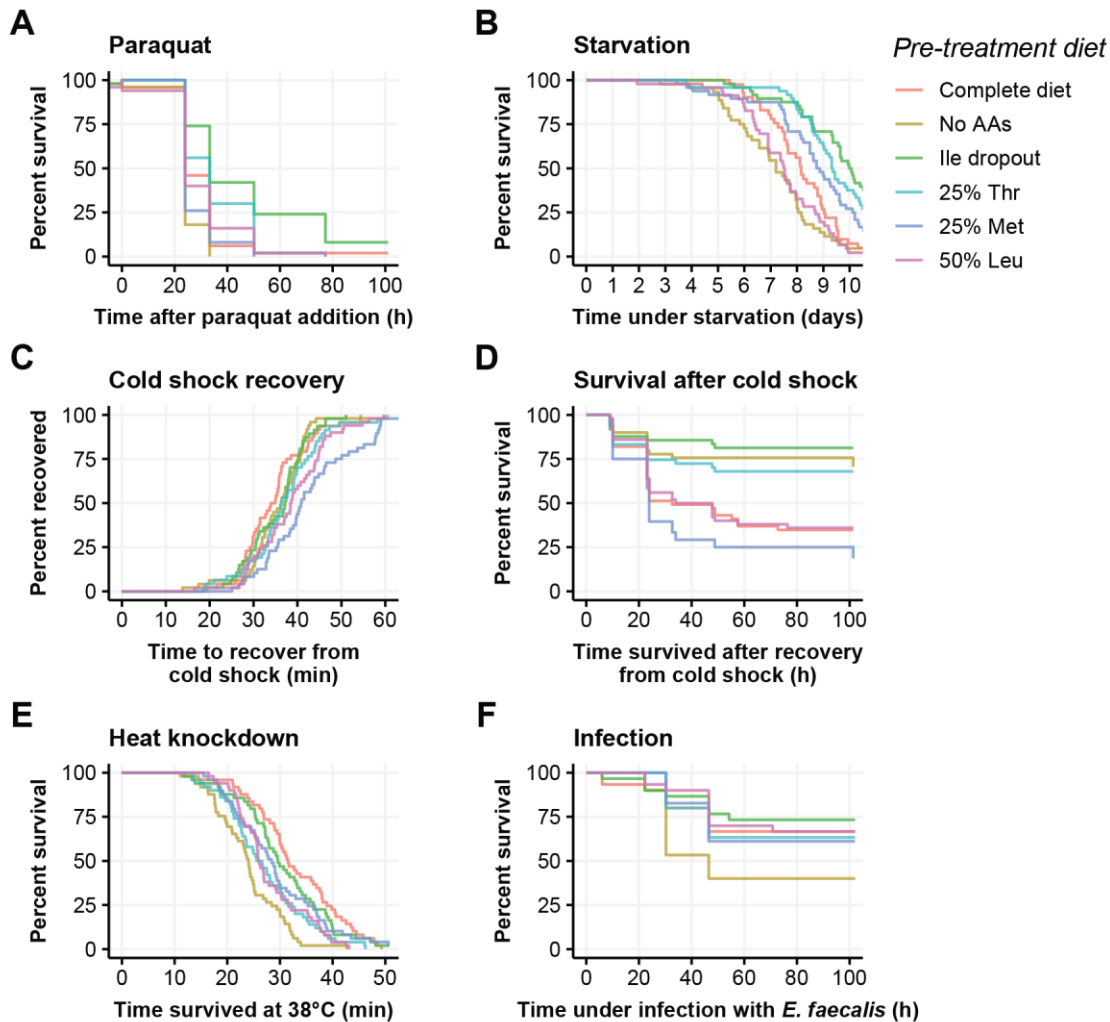

946

### 947 **Supplementary Figure 3. Survival curves of the data presented in Figure 5**

948 Flies were pre-treated with one of six diets before being exposed to a physical stress. (A)

949 Flies that were pre-treated with an isoleucine dropout were more resistant to 10mM paraquat  
950 ( $P < 0.001$ ), and removing all amino acids reduced paraquat resistance ( $P = 0.003$ ). (B)

951 Starvation resistance was increased by pre-treating flies with an isoleucine dropout ( $P <$   
952  $0.001$ ) or a diet containing either 25% threonine ( $P < 0.001$ ) or methionine ( $P < 0.05$ ).

953 When cold shocked flies were transferred to room temperature, the flies that were pre-treated  
954 with either a 25% methionine diet ( $P < 0.001$ ) or a 50% leucine diet ( $P = 0.01$ ) took longer to

955 recover, (D) However, the survival of these flies following cold shock was no different from

956 the complete diet ( $P > 0.2$ ). Survival after cold shock was improved when flies were pre-  
957 treated with a diet lacking all amino acids ( $P < 0.001$ ), an isoleucine dropout diet ( $P < 0.001$ ),  
958 or a 25% threonine diet ( $P = 0.004$ ). **(E)** Pre-treatment diets that lack all amino acids ( $P <$   
959  $0.001$ ) - or contain only 25% threonine ( $P = 0.002$ ) or 50% leucine ( $P = 0.002$ ) - increase  
960 susceptibility to heat knockdown. **(F)** Flies that were pre-treated with a diet lacking amino  
961 acids were more susceptible to infection with *E. faecalis*. The number of individuals varied  
962 between 29-50 flies per pre-treatment group for each experiment (Table 5).
